# Supplementary material for: Identification of long noncoding natural antisense transcripts (lncNATs) correlated with drought stress response in wild rice (Oryza nivara)
Source: BMC Genomics. 2021 Jun 8;22:424. doi: 10.1186/s12864-021-07754-4 (PMC8188688; doi:10.1186/s12864-021-07754-4)
Supplement: Supplementary file 2 — Additional file 2: Table S2. Different types of long noncoding RNAs (lncRNAs). [file 12864_2021_7754_MOESM2_ESM.xlsx]

## Sheet: Sheet1
Table S2. Different types of long noncoding RNAs (lncRNAs).
chromosome	gene id	transcript id	start	end	strand	length	exon number	type
chr01	MSTRG.60	MSTRG.60.1	401010	401769	-	760	1	lincRNA
chr01	MSTRG.179	MSTRG.179.1	953846	957492	-	617	3	lncNAT
chr01	MSTRG.293	MSTRG.293.1	1769312	1769840	+	494	2	lncNAT
chr01	MSTRG.329	MSTRG.329.1	1969122	1969568	+	447	1	lincRNA
chr01	MSTRG.362	MSTRG.362.1	2046860	2048573	+	1685	2	lncNAT
chr01	MSTRG.415	MSTRG.415.1	2430916	2431129	+	214	1	lincRNA
chr01	MSTRG.451	MSTRG.451.1	2693068	2695083	+	821	3	lncNAT
chr01	MSTRG.468	MSTRG.468.1	2770281	2774133	-	1823	12	lncNAT
chr01	MSTRG.489	MSTRG.489.1	2857305	2858136	+	832	1	lncNAT
chr01	MSTRG.519	MSTRG.519.1	2999576	3001237	-	785	3	lncNAT
chr01	MSTRG.654	MSTRG.654.1	3855146	3856033	+	888	1	lncNAT
chr01	MSTRG.687	MSTRG.687.1	4071292	4071661	-	370	1	lincRNA
chr01	MSTRG.723	MSTRG.723.1	4301143	4303062	+	1920	1	lncNAT
chr01	MSTRG.726	MSTRG.726.1	4315415	4315772	+	358	1	lncNAT
chr01	MSTRG.764	MSTRG.764.1	4600502	4601296	-	795	1	lincRNA
chr01	MSTRG.765	MSTRG.765.1	4610888	4611168	-	281	1	lincRNA
chr01	MSTRG.785	MSTRG.785.1	4800229	4802260	-	1281	3	lncNAT
chr01	MSTRG.795	MSTRG.795.1	4853219	4854369	-	584	3	lncNAT
chr01	MSTRG.797	MSTRG.797.1	4872141	4874789	+	2350	2	lncNAT
chr01	MSTRG.867	MSTRG.867.1	5478261	5479750	-	850	3	lncNAT
chr01	MSTRG.892	MSTRG.892.1	5669555	5671251	+	753	2	lncNAT
chr01	MSTRG.946	MSTRG.946.1	6010841	6011821	+	981	1	lncNAT
chr01	MSTRG.997	MSTRG.997.1	6427558	6428613	+	243	2	lincRNA
chr01	MSTRG.1028	MSTRG.1028.1	6649825	6650419	-	595	1	lncNAT
chr01	MSTRG.1031	MSTRG.1031.1	6653222	6655283	-	973	2	lncNAT
chr01	MSTRG.1069	MSTRG.1069.1	6925770	6941043	-	725	3	lncNAT
chr01	MSTRG.1084	MSTRG.1084.1	7059162	7059951	-	790	1	lincRNA
chr01	MSTRG.1126	MSTRG.1126.1	7360918	7362955	-	2038	1	lincRNA
chr01	MSTRG.1254	MSTRG.1254.1	8289959	8290734	-	735	2	lincRNA
chr01	MSTRG.1279	MSTRG.1279.1	8413919	8418863	+	983	3	lncNAT
chr01	MSTRG.1295	MSTRG.1295.1	8546015	8546972	+	958	1	lncNAT
chr01	MSTRG.1356	MSTRG.1356.1	9104495	9105214	-	720	1	lincRNA
chr01	MSTRG.1423	MSTRG.1423.1	9655301	9656481	-	1181	1	lincRNA
chr01	MSTRG.1454	MSTRG.1454.1	9874401	9876481	-	1466	5	lncNAT
chr01	MSTRG.1464	MSTRG.1464.1	9913496	9916197	-	1511	7	lncNAT
chr01	MSTRG.1470	MSTRG.1470.1	9990245	9991055	-	811	1	lincRNA
chr01	MSTRG.1483	MSTRG.1483.1	10133713	10135327	-	1615	1	lncNAT
chr01	MSTRG.1543	MSTRG.1543.1	10834376	10834626	-	251	1	lincRNA
chr01	MSTRG.1580	MSTRG.1580.1	11125301	11125575	-	275	1	lincRNA
chr01	MSTRG.1586	MSTRG.1586.1	11202426	11203335	+	910	1	lncNAT
chr01	MSTRG.1620	MSTRG.1620.1	11591178	11592307	+	1130	1	lincRNA
chr01	MSTRG.1634	MSTRG.1634.1	11689832	11691144	-	1313	1	lncNAT
chr01	MSTRG.1648	MSTRG.1648.1	11844258	11844489	-	232	1	lincRNA
chr01	MSTRG.1651	MSTRG.1651.1	11852968	11853614	+	647	1	lincRNA
chr01	MSTRG.1693	MSTRG.1693.1	12363054	12363294	+	241	1	lincRNA
chr01	MSTRG.1700	MSTRG.1700.1	12426051	12426768	-	718	1	lincRNA
chr01	MSTRG.1701	MSTRG.1701.1	12491333	12492782	+	1450	1	lincRNA
chr01	MSTRG.1823	MSTRG.1823.1	14083879	14086459	-	677	3	lincRNA
chr01	MSTRG.1850	MSTRG.1850.1	14342704	14350927	+	1711	4	lncNAT
chr01	MSTRG.1847	MSTRG.1847.1	14437006	14437255	+	250	1	lincRNA
chr01	MSTRG.1962	MSTRG.1962.1	15547454	15548160	-	707	1	lincRNA
chr01	MSTRG.1976	MSTRG.1976.1	15802368	15803061	-	694	1	lincRNA
chr01	MSTRG.1987	MSTRG.1987.1	16045903	16047144	-	933	2	lncNAT
chr01	MSTRG.1997	MSTRG.1997.1	16202336	16205502	+	1775	2	lincRNA
chr01	MSTRG.2002	MSTRG.2002.1	16232140	16233777	-	772	3	lncNAT
chr01	MSTRG.2030	MSTRG.2030.1	16750007	16750247	-	241	1	lincRNA
chr01	MSTRG.2032	MSTRG.2032.1	16845052	16845386	-	335	1	lincRNA
chr01	MSTRG.2053	MSTRG.2053.1	17348999	17350787	-	1672	2	lncNAT
chr01	MSTRG.2076	MSTRG.2076.1	17740771	17742227	-	1287	2	lncNAT
chr01	MSTRG.2101	MSTRG.2101.1	18011880	18012822	+	943	1	lincRNA
chr01	MSTRG.2111	MSTRG.2111.1	18116739	18122475	+	256	2	lincRNA
chr01	MSTRG.2164	MSTRG.2164.1	18684740	18685168	+	429	1	lincRNA
chr01	MSTRG.2225	MSTRG.2225.1	19393361	19396251	+	1953	4	lncNAT
chr01	MSTRG.2239	MSTRG.2239.1	19578465	19579506	+	1042	1	lincRNA
chr01	MSTRG.2240	MSTRG.2240.1	19691769	19692863	+	795	2	lincRNA
chr01	MSTRG.2259	MSTRG.2259.1	20031924	20035168	-	3245	1	lncNAT
chr01	MSTRG.2301	MSTRG.2301.1	20552274	20552728	+	455	1	lincRNA
chr01	MSTRG.2372	MSTRG.2372.1	21230437	21234906	-	1891	9	lncNAT
chr01	MSTRG.2395	MSTRG.2395.1	21624117	21626610	+	511	4	lncNAT
chr01	MSTRG.2407	MSTRG.2407.1	21715877	21716605	+	729	1	lncNAT
chr01	MSTRG.2432	MSTRG.2432.1	21949715	21956478	-	820	2	lncNAT
chr01	MSTRG.2469	MSTRG.2469.1	22491925	22492355	+	431	1	lincRNA
chr01	MSTRG.2478	MSTRG.2478.1	22565972	22566368	-	397	1	lincRNA
chr01	MSTRG.2483	MSTRG.2483.1	22617968	22624096	-	1795	4	lncNAT
chr01	MSTRG.2536	MSTRG.2536.1	23003252	23003758	-	507	1	lincRNA
chr01	MSTRG.2544	MSTRG.2544.1	23079465	23080928	-	1464	1	lncNAT
chr01	MSTRG.2565	MSTRG.2565.1	23303048	23303827	+	780	1	lncNAT
chr01	MSTRG.2587	MSTRG.2587.1	23438041	23438393	+	353	1	lincRNA
chr01	MSTRG.2627	MSTRG.2627.1	23770211	23772957	-	2621	2	lncNAT
chr01	MSTRG.2651	MSTRG.2651.1	23902155	23902708	+	554	1	lincRNA
chr01	MSTRG.2654	MSTRG.2654.1	23911517	23912731	-	706	5	lncNAT
chr01	MSTRG.2789	MSTRG.2789.1	24951592	24952594	+	1003	1	lincRNA
chr01	MSTRG.2837	MSTRG.2837.1	25350630	25351704	+	967	2	lncNAT
chr01	MSTRG.2852	MSTRG.2852.1	25476362	25477693	+	1332	1	lncNAT
chr01	MSTRG.2874	MSTRG.2874.1	25632363	25632870	-	508	1	lincRNA
chr01	MSTRG.2880	MSTRG.2880.1	25700055	25705072	-	1243	8	lncNAT
chr01	MSTRG.2900	MSTRG.2900.1	25800593	25801847	+	1137	2	lncNAT
chr01	MSTRG.2897	MSTRG.2897.1	25818230	25818890	+	561	2	lincRNA
chr01	MSTRG.2920	MSTRG.2920.1	25971061	25972668	-	1608	1	lincRNA
chr01	MSTRG.2922	MSTRG.2922.1	26019189	26019390	-	202	1	lincRNA
chr01	MSTRG.2932	MSTRG.2932.1	26074713	26077023	-	2189	2	lncNAT
chr01	MSTRG.3013	MSTRG.3013.1	26698551	26704018	+	371	2	lncNAT
chr01	MSTRG.3036	MSTRG.3036.1	26899628	26900967	+	1340	1	lincRNA
chr01	MSTRG.3069	MSTRG.3069.1	27162742	27163651	-	910	1	lincRNA
chr01	MSTRG.3084	MSTRG.3084.1	27246319	27247708	-	578	3	lncNAT
chr01	MSTRG.3159	MSTRG.3159.1	27891790	27892779	+	990	1	lincRNA
chr01	MSTRG.3227	MSTRG.3227.1	28302923	28304839	-	1917	1	lncNAT
chr01	MSTRG.3250	MSTRG.3250.1	28389065	28389730	+	666	1	lincRNA
chr01	MSTRG.3272	MSTRG.3272.1	28563321	28564618	-	1298	1	lincRNA
chr01	MSTRG.3313	MSTRG.3313.1	28791462	28793617	+	1394	2	lincRNA
chr01	MSTRG.3372	MSTRG.3372.1	29213313	29214388	-	989	2	lincRNA
chr01	MSTRG.3399	MSTRG.3399.1	29405674	29408662	-	398	2	lncNAT
chr01	MSTRG.3422	MSTRG.3422.1	29550486	29553970	-	3485	1	lncNAT
chr01	MSTRG.3471	MSTRG.3471.1	29842629	29846826	+	2018	7	lncNAT
chr01	MSTRG.3475	MSTRG.3475.1	29894045	29898467	-	1820	5	lncNAT
chr01	MSTRG.3512	MSTRG.3512.1	30095453	30097969	+	1117	5	lncNAT
chr01	MSTRG.3652	MSTRG.3652.1	30868667	30869919	-	452	3	lncNAT
chr01	MSTRG.3730	MSTRG.3730.1	31365212	31366696	-	1448	2	lncNAT
chr01	MSTRG.3733	MSTRG.3733.1	31376439	31377442	+	1004	1	lncNAT
chr01	MSTRG.3739	MSTRG.3739.1	31408566	31411061	+	2252	3	lncNAT
chr01	MSTRG.3738	MSTRG.3738.1	31415382	31417245	+	1864	1	lincRNA
chr01	MSTRG.3747	MSTRG.3747.1	31489422	31490180	+	654	2	lncNAT
chr01	MSTRG.4054	MSTRG.4054.1	33505319	33507031	+	1713	1	lincRNA
chr01	MSTRG.4078	MSTRG.4078.1	33638202	33640912	-	2711	1	lincRNA
chr01	MSTRG.4150	MSTRG.4150.1	34033159	34034693	-	830	3	lncNAT
chr01	MSTRG.4191	MSTRG.4191.1	34379265	34383021	-	861	6	lncNAT
chr01	MSTRG.4273	MSTRG.4273.1	34915840	34916122	+	283	1	lincRNA
chr01	MSTRG.4312	MSTRG.4312.1	35204172	35205673	-	415	2	lincRNA
chr01	MSTRG.4377	MSTRG.4377.1	35682036	35685727	-	1333	3	lncNAT
chr01	MSTRG.4517	MSTRG.4517.1	36533309	36535025	+	1717	1	lincRNA
chr01	MSTRG.4549	MSTRG.4549.1	36894214	36897202	-	2884	2	lncNAT
chr01	MSTRG.4552	MSTRG.4552.1	36940410	36941277	+	868	1	lincRNA
chr01	MSTRG.4639	MSTRG.4639.1	37519523	37520006	-	380	2	lncNAT
chr01	MSTRG.4714	MSTRG.4714.1	37932170	37933328	-	1077	2	lncNAT
chr01	MSTRG.4873	MSTRG.4873.1	38843760	38844692	-	368	2	lncNAT
chr01	MSTRG.4881	MSTRG.4881.1	38891119	38892841	-	627	3	lncNAT
chr01	MSTRG.4892	MSTRG.4892.1	38954948	38955462	-	515	1	lncNAT
chr01	MSTRG.4902	MSTRG.4902.1	38992484	38993798	+	586	5	lncNAT
chr01	MSTRG.4962	MSTRG.4962.1	39420654	39422280	-	1627	1	lncNAT
chr01	MSTRG.4974	MSTRG.4974.1	39516505	39517948	-	1444	1	lincRNA
chr01	MSTRG.4996	MSTRG.4996.1	39677433	39677868	-	436	1	lincRNA
chr01	MSTRG.4998	MSTRG.4998.1	39682769	39683440	+	672	1	lncNAT
chr01	MSTRG.5063	MSTRG.5063.1	40064150	40066375	+	900	3	lncNAT
chr01	MSTRG.5072	MSTRG.5072.1	40130358	40132362	-	1231	3	lncNAT
chr01	MSTRG.5079	MSTRG.5079.1	40167785	40170121	-	1095	3	lncNAT
chr01	MSTRG.5089	MSTRG.5089.1	40229684	40231145	-	1462	1	lncNAT
chr01	MSTRG.5106	MSTRG.5106.1	40344429	40364521	-	1155	5	lncNAT
chr01	MSTRG.5153	MSTRG.5153.1	40695683	40700934	-	3149	15	lncNAT
chr01	MSTRG.5170	MSTRG.5170.1	40812405	40814294	-	1679	2	lncNAT
chr01	MSTRG.5322	MSTRG.5322.1	41728691	41729769	+	766	3	lncNAT
chr01	MSTRG.5383	MSTRG.5383.1	42160528	42161591	+	1064	1	lincRNA
chr01	MSTRG.5441	MSTRG.5441.1	42460555	42461933	-	939	2	lncNAT
chr01	MSTRG.5440	MSTRG.5440.1	42464053	42464955	-	903	1	lincRNA
chr01	MSTRG.5528	MSTRG.5528.1	43047108	43047878	-	597	3	lncNAT
chr01	MSTRG.5539	MSTRG.5539.1	43107643	43108314	-	672	1	lncNAT
chr02	MSTRG.5588	MSTRG.5588.1	79701	82869	+	1607	12	lncNAT
chr02	MSTRG.5644	MSTRG.5644.1	429878	438754	-	930	2	lincRNA
chr02	MSTRG.5718	MSTRG.5718.1	894802	895595	+	717	2	lncNAT
chr02	MSTRG.5910	MSTRG.5910.1	1972937	1974572	+	903	2	lncNAT
chr02	MSTRG.5942	MSTRG.5942.1	2225634	2226242	-	609	1	lincRNA
chr02	MSTRG.5961	MSTRG.5961.1	2437826	2438133	+	308	1	lincRNA
chr02	MSTRG.6001	MSTRG.6001.1	2744305	2747097	-	1210	8	lncNAT
chr02	MSTRG.6037	MSTRG.6037.1	3012288	3012904	-	617	1	lincRNA
chr02	MSTRG.6038	MSTRG.6038.1	3013478	3013841	-	364	1	lincRNA
chr02	MSTRG.6136	MSTRG.6136.1	3545148	3545886	-	739	1	lincRNA
chr02	MSTRG.6140	MSTRG.6140.1	3555596	3556123	-	528	1	lincRNA
chr02	MSTRG.6183	MSTRG.6183.1	3799383	3800995	-	1162	3	lncNAT
chr02	MSTRG.6195	MSTRG.6195.1	3925541	3926248	+	663	2	lncNAT
chr02	MSTRG.6357	MSTRG.6357.1	4964841	4966149	-	1309	1	lincRNA
chr02	MSTRG.6440	MSTRG.6440.1	5468474	5470478	+	1360	3	lncNAT
chr02	MSTRG.6458	MSTRG.6458.1	5583559	5584930	-	1372	1	lincRNA
chr02	MSTRG.6474	MSTRG.6474.1	5641927	5644398	+	507	3	lncNAT
chr02	MSTRG.6508	MSTRG.6508.1	5938402	5939492	-	1091	1	lincRNA
chr02	MSTRG.6592	MSTRG.6592.1	6549431	6550162	-	732	1	lincRNA
chr02	MSTRG.6636	MSTRG.6636.1	6814953	6816052	-	1012	2	lincRNA
chr02	MSTRG.6650	MSTRG.6650.1	6994789	6995447	-	659	1	lincRNA
chr02	MSTRG.6747	MSTRG.6747.1	7972369	7972831	-	463	1	lincRNA
chr02	MSTRG.6749	MSTRG.6749.1	7977330	7979220	+	1770	2	lncNAT
chr02	MSTRG.6754	MSTRG.6754.1	8051065	8051958	-	872	2	lncNAT
chr02	MSTRG.6776	MSTRG.6776.1	8219278	8221345	+	2068	1	lincRNA
chr02	MSTRG.6770	MSTRG.6770.1	8231974	8232923	+	950	1	lincRNA
chr02	MSTRG.6807	MSTRG.6807.1	8501879	8502444	-	477	2	lncNAT
chr02	MSTRG.6814	MSTRG.6814.1	8533402	8533633	-	232	1	lncNAT
chr02	MSTRG.6831	MSTRG.6831.1	8729185	8730605	+	662	6	lncNAT
chr02	MSTRG.6860	MSTRG.6860.1	8973277	8974394	-	1118	1	lncNAT
chr02	MSTRG.6876	MSTRG.6876.1	9198199	9198445	-	247	1	lincRNA
chr02	MSTRG.6977	MSTRG.6977.1	10515544	10519739	-	3634	3	lincRNA
chr02	MSTRG.6987	MSTRG.6987.1	10700796	10701517	+	722	1	lncNAT
chr02	MSTRG.7034	MSTRG.7034.1	11127911	11128862	+	952	1	lincRNA
chr02	MSTRG.7069	MSTRG.7069.1	11568172	11569112	-	941	1	lncNAT
chr02	MSTRG.7091	MSTRG.7091.1	11894399	11906141	-	870	3	lincRNA
chr02	MSTRG.7094	MSTRG.7094.1	11951313	11953552	+	879	5	lincRNA
chr02	MSTRG.7133	MSTRG.7133.1	12409629	12410720	-	1092	1	lincRNA
chr02	MSTRG.7153	MSTRG.7153.1	12645006	12647698	-	2610	2	lncNAT
chr02	MSTRG.7185	MSTRG.7185.1	13041595	13042895	-	1301	1	lncNAT
chr02	MSTRG.7200	MSTRG.7200.1	13248835	13249155	-	321	1	lincRNA
chr02	MSTRG.7202	MSTRG.7202.1	13252580	13253831	+	1252	1	lincRNA
chr02	MSTRG.7204	MSTRG.7204.1	13297621	13298062	-	442	1	lincRNA
chr02	MSTRG.7208	MSTRG.7208.1	13340843	13341282	-	353	2	lincRNA
chr02	MSTRG.7230	MSTRG.7230.1	13878334	13880503	+	2061	2	lincRNA
chr02	MSTRG.7272	MSTRG.7272.1	14966115	14967504	-	1130	2	lncNAT
chr02	MSTRG.7360	MSTRG.7360.1	15891134	15895226	-	1958	4	lncNAT
chr02	MSTRG.7384	MSTRG.7384.1	16242819	16243455	-	637	1	lncNAT
chr02	MSTRG.7388	MSTRG.7388.1	16297504	16298603	+	1100	1	lincRNA
chr02	MSTRG.7438	MSTRG.7438.1	17000223	17001609	-	1387	1	lincRNA
chr02	MSTRG.7473	MSTRG.7473.1	17416393	17418967	-	528	2	lncNAT
chr02	MSTRG.7498	MSTRG.7498.1	17786008	17787309	-	1302	1	lincRNA
chr02	MSTRG.7502	MSTRG.7502.1	17846274	17847845	-	618	4	lncNAT
chr02	MSTRG.7504	MSTRG.7504.1	17859626	17860358	+	733	1	lincRNA
chr02	MSTRG.7513	MSTRG.7513.1	17880883	17884472	-	3195	3	lncNAT
chr02	MSTRG.7545	MSTRG.7545.1	18231711	18235690	+	315	3	lncNAT
chr02	MSTRG.7667	MSTRG.7667.1	19414783	19415074	+	252	2	lncNAT
chr02	MSTRG.7687	MSTRG.7687.1	19595948	19598742	+	2795	1	lncNAT
chr02	MSTRG.7730	MSTRG.7730.1	19950571	19951044	-	378	2	lincRNA
chr02	MSTRG.7734	MSTRG.7734.1	19994912	19995889	+	978	1	lincRNA
chr02	MSTRG.7735	MSTRG.7735.1	20000427	20002297	-	1871	1	lncNAT
chr02	MSTRG.7763	MSTRG.7763.1	20305792	20306615	-	824	1	lincRNA
chr02	MSTRG.7766	MSTRG.7766.1	20367473	20367812	-	340	1	lincRNA
chr02	MSTRG.7767	MSTRG.7767.1	20438556	20438905	-	350	1	lincRNA
chr02	MSTRG.7922	MSTRG.7922.1	21563480	21566690	+	1030	4	lncNAT
chr02	MSTRG.7985	MSTRG.7985.1	22205338	22207149	-	1812	1	lincRNA
chr02	MSTRG.8078	MSTRG.8078.1	22798134	22798572	+	439	1	lincRNA
chr02	MSTRG.8089	MSTRG.8089.1	22898277	22899140	+	864	1	lincRNA
chr02	MSTRG.8132	MSTRG.8132.1	23198727	23199896	-	1170	1	lincRNA
chr02	MSTRG.8136	MSTRG.8136.1	23246228	23247486	+	1166	2	lincRNA
chr02	MSTRG.8189	MSTRG.8189.1	23626547	23627534	+	988	1	lincRNA
chr02	MSTRG.8205	MSTRG.8205.1	23743041	23745011	+	1876	2	lncNAT
chr02	MSTRG.8232	MSTRG.8232.1	23890984	23892927	-	571	2	lncNAT
chr02	MSTRG.8264	MSTRG.8264.1	24152037	24153094	+	1058	1	lncNAT
chr02	MSTRG.8274	MSTRG.8274.1	24253164	24257808	-	268	2	lincRNA
chr02	MSTRG.8301	MSTRG.8301.1	24450101	24450301	-	201	1	lincRNA
chr02	MSTRG.8349	MSTRG.8349.1	24778811	24779073	+	263	1	lncNAT
chr02	MSTRG.8381	MSTRG.8381.1	25146618	25147276	+	659	1	lncNAT
chr02	MSTRG.8410	MSTRG.8410.1	25354008	25355801	+	819	2	lincRNA
chr02	MSTRG.8417	MSTRG.8417.1	25373390	25374483	+	679	2	lincRNA
chr02	MSTRG.8427	MSTRG.8427.1	25431187	25433767	-	1434	2	lncNAT
chr02	MSTRG.8493	MSTRG.8493.1	25908107	25908325	-	219	1	lincRNA
chr02	MSTRG.8524	MSTRG.8524.1	26143318	26144967	-	1563	2	lncNAT
chr02	MSTRG.8539	MSTRG.8539.1	26248625	26250947	+	956	7	lncNAT
chr02	MSTRG.8667	MSTRG.8667.1	27114567	27115167	-	601	1	lincRNA
chr02	MSTRG.8670	MSTRG.8670.1	27165456	27166898	+	1349	2	lncNAT
chr02	MSTRG.8679	MSTRG.8679.1	27228688	27229723	-	1036	1	lncNAT
chr02	MSTRG.8686	MSTRG.8686.1	27271454	27271713	+	260	1	lincRNA
chr02	MSTRG.8725	MSTRG.8725.1	27656663	27658180	+	1490	2	lincRNA
chr02	MSTRG.8733	MSTRG.8733.1	27739962	27741584	+	1623	1	lincRNA
chr02	MSTRG.8810	MSTRG.8810.1	28362020	28362615	-	596	1	lincRNA
chr02	MSTRG.8829	MSTRG.8829.1	28572882	28575259	+	2378	1	lincRNA
chr02	MSTRG.8880	MSTRG.8880.1	28853564	28854908	-	1345	1	lincRNA
chr02	MSTRG.8885	MSTRG.8885.1	28893434	28897419	-	1933	6	lncNAT
chr02	MSTRG.8922	MSTRG.8922.1	29113516	29115192	-	429	3	lncNAT
chr02	MSTRG.9084	MSTRG.9084.1	30276471	30279286	+	746	3	lncNAT
chr02	MSTRG.9151	MSTRG.9151.1	30625385	30626816	-	1297	2	lncNAT
chr02	MSTRG.9235	MSTRG.9235.1	31202619	31203663	-	715	4	lncNAT
chr02	MSTRG.9240	MSTRG.9240.1	31254856	31255894	+	488	4	lncNAT
chr02	MSTRG.9260	MSTRG.9260.1	31314099	31314855	-	757	1	lincRNA
chr02	MSTRG.9325	MSTRG.9325.1	31798662	31800437	+	1776	1	lincRNA
chr02	MSTRG.9349	MSTRG.9349.1	31982481	31983297	+	817	1	lincRNA
chr02	MSTRG.9356	MSTRG.9356.1	32017725	32019866	+	694	5	lncNAT
chr02	MSTRG.9363	MSTRG.9363.1	32039131	32042537	-	407	4	lncNAT
chr02	MSTRG.9399	MSTRG.9399.1	32261788	32267075	+	456	3	lncNAT
chr02	MSTRG.9559	MSTRG.9559.1	33417288	33421341	-	1469	3	lincRNA
chr02	MSTRG.9608	MSTRG.9608.1	33726970	33728209	-	1240	1	lncNAT
chr02	MSTRG.9652	MSTRG.9652.1	33976848	33978275	-	1034	3	lncNAT
chr02	MSTRG.9768	MSTRG.9768.1	34755063	34756234	-	1172	1	lincRNA
chr02	MSTRG.9786	MSTRG.9786.1	34879571	34881600	+	1837	3	lncNAT
chr02	MSTRG.9804	MSTRG.9804.1	34930391	34931774	-	517	4	lncNAT
chr02	MSTRG.9811	MSTRG.9811.1	34966472	34971945	+	3471	6	lncNAT
chr02	MSTRG.9880	MSTRG.9880.1	35349577	35351326	-	1517	2	lncNAT
chr02	MSTRG.9902	MSTRG.9902.1	35436184	35437250	+	568	2	lincRNA
chr02	MSTRG.9948	MSTRG.9948.1	35648344	35649500	+	1157	1	lincRNA
chr02	MSTRG.9957	MSTRG.9957.1	35700174	35703873	+	3700	1	lincRNA
chr03	MSTRG.10095	MSTRG.10095.1	505918	507377	-	958	3	lncNAT
chr03	MSTRG.10173	MSTRG.10173.1	983394	984961	-	1568	1	lincRNA
chr03	MSTRG.10201	MSTRG.10201.1	1056276	1056611	-	336	1	lncNAT
chr03	MSTRG.10370	MSTRG.10370.1	2132137	2133929	+	1793	1	lncNAT
chr03	MSTRG.10365	MSTRG.10365.1	2142891	2145373	-	545	3	lncNAT
chr03	MSTRG.10386	MSTRG.10386.1	2264149	2264388	-	240	1	lincRNA
chr03	MSTRG.10426	MSTRG.10426.1	2538521	2542507	-	2932	5	lincRNA
chr03	MSTRG.10483	MSTRG.10483.1	2866415	2868138	+	1357	4	lncNAT
chr03	MSTRG.10531	MSTRG.10531.1	3131372	3132824	-	1376	3	lncNAT
chr03	MSTRG.10554	MSTRG.10554.1	3208908	3210273	-	1116	3	lncNAT
chr03	MSTRG.10568	MSTRG.10568.1	3338283	3340881	-	1025	7	lncNAT
chr03	MSTRG.10570	MSTRG.10570.1	3342143	3344510	-	1422	2	lncNAT
chr03	MSTRG.10673	MSTRG.10673.1	3943668	3955905	+	428	2	lincRNA
chr03	MSTRG.10689	MSTRG.10689.1	4054087	4054311	+	225	1	lincRNA
chr03	MSTRG.10714	MSTRG.10714.1	4164808	4165431	+	624	1	lincRNA
chr03	MSTRG.10729	MSTRG.10729.1	4248881	4249894	-	1014	1	lncNAT
chr03	MSTRG.10751	MSTRG.10751.1	4372219	4373460	+	1242	1	lncNAT
chr03	MSTRG.10780	MSTRG.10780.1	4527501	4528219	-	719	1	lincRNA
chr03	MSTRG.10782	MSTRG.10782.1	4528558	4529188	+	631	1	lincRNA
chr03	MSTRG.10902	MSTRG.10902.1	5272301	5272737	-	437	1	lncNAT
chr03	MSTRG.10922	MSTRG.10922.1	5422175	5423927	-	1662	2	lncNAT
chr03	MSTRG.10961	MSTRG.10961.1	5665128	5666022	-	895	1	lincRNA
chr03	MSTRG.11042	MSTRG.11042.1	6184289	6187897	-	1699	4	lincRNA
chr03	MSTRG.11061	MSTRG.11061.1	6335985	6336418	-	434	1	lincRNA
chr03	MSTRG.11064	MSTRG.11064.1	6336916	6340355	+	1721	4	lincRNA
chr03	MSTRG.11184	MSTRG.11184.1	7234969	7235668	-	700	1	lincRNA
chr03	MSTRG.11200	MSTRG.11200.1	7322525	7323717	-	479	2	lncNAT
chr03	MSTRG.11210	MSTRG.11210.1	7430044	7430366	-	323	1	lincRNA
chr03	MSTRG.11286	MSTRG.11286.1	7909093	7909879	-	787	1	lincRNA
chr03	MSTRG.11304	MSTRG.11304.1	8007159	8008613	+	1455	1	lncNAT
chr03	MSTRG.11312	MSTRG.11312.1	8126974	8127378	-	405	1	lincRNA
chr03	MSTRG.11342	MSTRG.11342.1	8397994	8398749	-	756	1	lincRNA
chr03	MSTRG.11348	MSTRG.11348.1	8423039	8423462	-	424	1	lincRNA
chr03	MSTRG.11356	MSTRG.11356.1	8530995	8533071	+	2077	1	lncNAT
chr03	MSTRG.11376	MSTRG.11376.1	8668199	8671039	-	587	4	lncNAT
chr03	MSTRG.11412	MSTRG.11412.1	8841312	8843015	+	1399	4	lncNAT
chr03	MSTRG.11435	MSTRG.11435.1	8988972	8989202	-	231	1	lincRNA
chr03	MSTRG.11461	MSTRG.11461.1	9180901	9188362	+	1304	2	lncNAT
chr03	MSTRG.11577	MSTRG.11577.1	9897033	9898086	-	1054	1	lincRNA
chr03	MSTRG.11579	MSTRG.11579.1	9899748	9900385	+	514	2	lncNAT
chr03	MSTRG.11687	MSTRG.11687.1	10567217	10567968	+	752	1	lincRNA
chr03	MSTRG.11715	MSTRG.11715.1	10729853	10731007	+	1155	1	lincRNA
chr03	MSTRG.11767	MSTRG.11767.1	11065988	11066505	+	498	2	lincRNA
chr03	MSTRG.11774	MSTRG.11774.1	11096625	11097961	-	1337	1	lincRNA
chr03	MSTRG.11813	MSTRG.11813.1	11434828	11435555	-	728	1	lincRNA
chr03	MSTRG.11857	MSTRG.11857.1	11739150	11740089	+	940	1	lincRNA
chr03	MSTRG.11933	MSTRG.11933.1	12361547	12362806	-	1260	1	lncNAT
chr03	MSTRG.11935	MSTRG.11935.1	12366079	12367558	-	1480	1	lincRNA
chr03	MSTRG.11943	MSTRG.11943.1	12402194	12404093	-	505	2	lncNAT
chr03	MSTRG.12001	MSTRG.12001.1	12798230	12799684	+	676	2	lncNAT
chr03	MSTRG.12003	MSTRG.12003.1	12800795	12802123	-	1329	1	lincRNA
chr03	MSTRG.12006	MSTRG.12006.1	12830633	12831782	-	1150	1	lncNAT
chr03	MSTRG.12033	MSTRG.12033.1	13083206	13084238	-	1033	1	lncNAT
chr03	MSTRG.12044	MSTRG.12044.1	13150143	13150936	+	794	1	lincRNA
chr03	MSTRG.12049	MSTRG.12049.1	13161277	13163335	-	2059	1	lncNAT
chr03	MSTRG.12055	MSTRG.12055.1	13181400	13184566	-	894	8	lncNAT
chr03	MSTRG.12070	MSTRG.12070.1	13470797	13478165	-	842	4	lncNAT
chr03	MSTRG.12100	MSTRG.12100.1	13827268	13877283	+	311	2	lncNAT
chr03	MSTRG.12185	MSTRG.12185.1	14548985	14549509	+	525	1	lncNAT
chr03	MSTRG.12236	MSTRG.12236.1	14964322	14965047	+	726	1	lincRNA
chr03	MSTRG.12265	MSTRG.12265.1	15314289	15315745	+	659	3	lincRNA
chr03	MSTRG.12294	MSTRG.12294.1	15612860	15613249	+	390	1	lincRNA
chr03	MSTRG.12371	MSTRG.12371.1	16273643	16274940	+	866	2	lincRNA
chr03	MSTRG.12376	MSTRG.12376.1	16322127	16322821	+	695	1	lincRNA
chr03	MSTRG.12385	MSTRG.12385.1	16407687	16410061	+	1240	5	lncNAT
chr03	MSTRG.12458	MSTRG.12458.1	17258574	17259348	+	775	1	lincRNA
chr03	MSTRG.12516	MSTRG.12516.1	17873271	17878256	-	2252	3	lincRNA
chr03	MSTRG.12524	MSTRG.12524.1	17939634	17942691	-	1555	4	lncNAT
chr03	MSTRG.12529	MSTRG.12529.1	17996680	17998280	-	772	3	lncNAT
chr03	MSTRG.12564	MSTRG.12564.1	18450985	18456308	+	1326	2	lncNAT
chr03	MSTRG.12567	MSTRG.12567.1	18485646	18487297	+	1555	2	lncNAT
chr03	MSTRG.12574	MSTRG.12574.1	18568300	18570098	-	1799	1	lncNAT
chr03	MSTRG.12688	MSTRG.12688.1	21030432	21031298	-	867	1	lncNAT
chr03	MSTRG.12706	MSTRG.12706.1	21185956	21186575	-	620	1	lincRNA
chr03	MSTRG.12748	MSTRG.12748.1	21498090	21500564	-	1408	7	lncNAT
chr03	MSTRG.12742	MSTRG.12742.1	21550776	21551216	+	441	1	lincRNA
chr03	MSTRG.12763	MSTRG.12763.1	21745652	21748004	-	2353	1	lncNAT
chr03	MSTRG.12774	MSTRG.12774.1	21864835	21867151	-	975	4	lincRNA
chr03	MSTRG.12784	MSTRG.12784.1	21999480	22001387	-	1819	2	lncNAT
chr03	MSTRG.12791	MSTRG.12791.1	22089468	22090391	+	924	1	lincRNA
chr03	MSTRG.12799	MSTRG.12799.1	22107360	22108016	-	657	1	lincRNA
chr03	MSTRG.12859	MSTRG.12859.1	22702655	22705677	-	3023	1	lncNAT
chr03	MSTRG.12868	MSTRG.12868.1	22791598	22791831	+	234	1	lincRNA
chr03	MSTRG.12897	MSTRG.12897.1	23092774	23094721	+	1540	3	lncNAT
chr03	MSTRG.12940	MSTRG.12940.1	23602334	23603472	+	1026	2	lincRNA
chr03	MSTRG.12954	MSTRG.12954.1	23785163	23785723	+	561	1	lincRNA
chr03	MSTRG.12991	MSTRG.12991.1	24220021	24221988	+	541	2	lncNAT
chr03	MSTRG.12999	MSTRG.12999.1	24308679	24311740	-	569	2	lincRNA
chr03	MSTRG.13071	MSTRG.13071.1	25087446	25088093	-	648	1	lincRNA
chr03	MSTRG.13131	MSTRG.13131.1	25563613	25564451	-	686	2	lncNAT
chr03	MSTRG.13146	MSTRG.13146.1	25673001	25673270	+	270	1	lincRNA
chr03	MSTRG.13147	MSTRG.13147.1	25680599	25681309	+	711	1	lincRNA
chr03	MSTRG.13253	MSTRG.13253.1	26646123	26650022	+	2739	5	lincRNA
chr03	MSTRG.13272	MSTRG.13272.1	26823296	26824937	+	734	3	lincRNA
chr03	MSTRG.13291	MSTRG.13291.1	27087853	27088089	+	237	1	lincRNA
chr03	MSTRG.13319	MSTRG.13319.1	27287982	27290338	-	774	5	lncNAT
chr03	MSTRG.13325	MSTRG.13325.1	27333934	27337218	-	916	2	lncNAT
chr03	MSTRG.13335	MSTRG.13335.1	27373388	27373899	-	512	1	lincRNA
chr03	MSTRG.13377	MSTRG.13377.1	27696728	27697288	+	561	1	lincRNA
chr03	MSTRG.13414	MSTRG.13414.1	28003491	28004451	+	961	1	lncNAT
chr03	MSTRG.13460	MSTRG.13460.1	28267978	28268303	-	326	1	lincRNA
chr03	MSTRG.13481	MSTRG.13481.1	28512649	28515113	-	2465	1	lncNAT
chr03	MSTRG.13503	MSTRG.13503.1	28651033	28652848	+	873	2	lncNAT
chr03	MSTRG.13552	MSTRG.13552.1	29032131	29032916	-	786	1	lincRNA
chr03	MSTRG.13565	MSTRG.13565.1	29087824	29088344	-	521	1	lincRNA
chr03	MSTRG.13599	MSTRG.13599.1	29377411	29378147	-	737	1	lincRNA
chr03	MSTRG.13627	MSTRG.13627.1	29541333	29543273	-	1941	1	lncNAT
chr03	MSTRG.13633	MSTRG.13633.1	29560589	29566103	+	2238	12	lncNAT
chr03	MSTRG.13647	MSTRG.13647.1	29760089	29763123	-	1477	4	lincRNA
chr03	MSTRG.13758	MSTRG.13758.1	30507489	30511236	+	2559	4	lincRNA
chr03	MSTRG.13759	MSTRG.13759.1	30513870	30516487	-	817	3	lncNAT
chr03	MSTRG.13778	MSTRG.13778.1	30597691	30599358	+	480	3	lncNAT
chr03	MSTRG.13825	MSTRG.13825.1	30905948	30907117	+	974	3	lncNAT
chr03	MSTRG.13826	MSTRG.13826.1	30924601	30924886	+	286	1	lincRNA
chr03	MSTRG.13877	MSTRG.13877.1	31255997	31259120	-	550	3	lncNAT
chr03	MSTRG.13899	MSTRG.13899.1	31388397	31390767	-	822	6	lncNAT
chr03	MSTRG.13911	MSTRG.13911.1	31443381	31446094	-	1988	2	lncNAT
chr03	MSTRG.13919	MSTRG.13919.1	31468447	31469411	-	965	1	lncNAT
chr03	MSTRG.13937	MSTRG.13937.1	31550244	31550599	+	356	1	lincRNA
chr03	MSTRG.13966	MSTRG.13966.1	31754067	31756460	-	2112	2	lncNAT
chr03	MSTRG.13979	MSTRG.13979.1	31790640	31793207	-	1063	4	lncNAT
chr03	MSTRG.13995	MSTRG.13995.1	31862519	31863039	+	377	2	lncNAT
chr03	MSTRG.14105	MSTRG.14105.1	32645411	32646908	+	1498	1	lncNAT
chr03	MSTRG.14157	MSTRG.14157.1	32919484	32920217	-	734	1	lincRNA
chr03	MSTRG.14161	MSTRG.14161.1	32944896	32945488	-	593	1	lincRNA
chr03	MSTRG.14194	MSTRG.14194.1	33061236	33064959	-	2320	3	lncNAT
chr03	MSTRG.14203	MSTRG.14203.1	33119049	33119800	+	752	1	lincRNA
chr03	MSTRG.14243	MSTRG.14243.1	33354928	33355486	-	559	1	lincRNA
chr03	MSTRG.14297	MSTRG.14297.1	33616306	33617675	+	346	2	lncNAT
chr03	MSTRG.14365	MSTRG.14365.1	34001063	34002406	+	576	2	lncNAT
chr03	MSTRG.14386	MSTRG.14386.1	34166111	34167647	-	1408	2	lncNAT
chr03	MSTRG.14415	MSTRG.14415.1	34354166	34354852	-	687	1	lincRNA
chr03	MSTRG.14433	MSTRG.14433.1	34430246	34431383	-	974	2	lncNAT
chr03	MSTRG.14499	MSTRG.14499.1	34724250	34727244	-	2210	3	lncNAT
chr03	MSTRG.14510	MSTRG.14510.1	34768877	34772505	-	1886	6	lncNAT
chr03	MSTRG.14628	MSTRG.14628.1	35444513	35446184	-	781	2	lncNAT
chr03	MSTRG.14644	MSTRG.14644.1	35537934	35543326	-	1644	5	lincRNA
chr03	MSTRG.14651	MSTRG.14651.1	35600480	35601480	-	702	2	lincRNA
chr03	MSTRG.14652	MSTRG.14652.1	35603220	35603539	+	300	2	lincRNA
chr03	MSTRG.14726	MSTRG.14726.1	36074903	36079476	-	986	3	lncNAT
chr03	MSTRG.14746	MSTRG.14746.1	36180640	36183188	+	1530	8	lncNAT
chr03	MSTRG.14742	MSTRG.14742.1	36193321	36193832	+	512	1	lncNAT
chr03	MSTRG.14744	MSTRG.14744.1	36202138	36202391	-	254	1	lincRNA
chr03	MSTRG.14747	MSTRG.14747.1	36203949	36205153	-	1205	1	lncNAT
chr04	MSTRG.14830	MSTRG.14830.1	543181	543383	+	203	1	lincRNA
chr04	MSTRG.14888	MSTRG.14888.1	1100315	1102287	+	617	2	lncNAT
chr04	MSTRG.14914	MSTRG.14914.1	1434560	1436829	+	829	3	lincRNA
chr04	MSTRG.14959	MSTRG.14959.1	2278417	2279993	-	910	2	lincRNA
chr04	MSTRG.14979	MSTRG.14979.1	2735098	2737196	-	871	3	lincRNA
chr04	MSTRG.14983	MSTRG.14983.1	2778878	2780869	-	728	3	lincRNA
chr04	MSTRG.14984	MSTRG.14984.1	2786709	2794804	+	875	2	lincRNA
chr04	MSTRG.14985	MSTRG.14985.1	2798503	2798836	+	334	1	lincRNA
chr04	MSTRG.14996	MSTRG.14996.1	3134305	3134577	+	273	1	lincRNA
chr04	MSTRG.15000	MSTRG.15000.1	3417204	3417538	+	243	2	lincRNA
chr04	MSTRG.15007	MSTRG.15007.1	3539240	3545613	-	1085	3	lncNAT
chr04	MSTRG.15011	MSTRG.15011.1	3603269	3605258	-	689	4	lincRNA
chr04	MSTRG.15038	MSTRG.15038.1	4256864	4259608	-	2106	3	lincRNA
chr04	MSTRG.15081	MSTRG.15081.1	4695536	4696574	-	1039	1	lincRNA
chr04	MSTRG.15161	MSTRG.15161.1	5908007	5908250	-	244	1	lincRNA
chr04	MSTRG.15206	MSTRG.15206.1	6829895	6832971	-	3053	2	lincRNA
chr04	MSTRG.15261	MSTRG.15261.1	7351124	7359370	+	1472	4	lincRNA
chr04	MSTRG.15282	MSTRG.15282.1	7939673	7943921	-	1280	8	lincRNA
chr04	MSTRG.15309	MSTRG.15309.1	8284693	8285221	+	313	3	lncNAT
chr04	MSTRG.15317	MSTRG.15317.1	8437176	8439558	-	936	3	lincRNA
chr04	MSTRG.15318	MSTRG.15318.1	8440250	8444760	-	1078	2	lincRNA
chr04	MSTRG.15326	MSTRG.15326.1	8518581	8519118	+	538	1	lncNAT
chr04	MSTRG.15341	MSTRG.15341.1	8855466	8857893	-	1016	3	lincRNA
chr04	MSTRG.15342	MSTRG.15342.1	8870471	8872889	+	958	3	lincRNA
chr04	MSTRG.15351	MSTRG.15351.1	9288935	9289764	-	830	1	lincRNA
chr04	MSTRG.15360	MSTRG.15360.1	9367885	9369547	+	1386	3	lncNAT
chr04	MSTRG.15362	MSTRG.15362.1	9470332	9471305	+	974	1	lincRNA
chr04	MSTRG.15398	MSTRG.15398.1	10947971	10949390	-	1420	1	lincRNA
chr04	MSTRG.15411	MSTRG.15411.1	11236167	11243982	-	2809	5	lncNAT
chr04	MSTRG.15417	MSTRG.15417.1	11348319	11349166	+	848	1	lincRNA
chr04	MSTRG.15470	MSTRG.15470.1	12337237	12337520	+	264	2	lincRNA
chr04	MSTRG.15522	MSTRG.15522.1	13466427	13468989	+	1429	4	lncNAT
chr04	MSTRG.15543	MSTRG.15543.1	13842703	13844383	-	1681	1	lincRNA
chr04	MSTRG.15568	MSTRG.15568.1	14096986	14097690	-	705	1	lincRNA
chr04	MSTRG.15633	MSTRG.15633.1	15515937	15518632	+	1110	4	lincRNA
chr04	MSTRG.15670	MSTRG.15670.1	16402160	16403564	+	1405	1	lincRNA
chr04	MSTRG.15714	MSTRG.15714.1	16907001	16907333	-	333	1	lincRNA
chr04	MSTRG.15727	MSTRG.15727.1	17087701	17092407	+	810	4	lincRNA
chr04	MSTRG.15736	MSTRG.15736.1	17236113	17237098	-	986	1	lincRNA
chr04	MSTRG.15742	MSTRG.15742.1	17425070	17425684	-	220	2	lincRNA
chr04	MSTRG.15743	MSTRG.15743.1	17440545	17443421	-	1034	5	lincRNA
chr04	MSTRG.15804	MSTRG.15804.1	18497240	18498075	+	836	1	lincRNA
chr04	MSTRG.15818	MSTRG.15818.1	18534522	18535291	+	531	2	lncNAT
chr04	MSTRG.15886	MSTRG.15886.1	19321474	19322315	-	842	1	lincRNA
chr04	MSTRG.15893	MSTRG.15893.1	19334810	19338392	+	462	3	lncNAT
chr04	MSTRG.15891	MSTRG.15891.1	19362199	19363543	-	1345	1	lincRNA
chr04	MSTRG.15946	MSTRG.15946.1	19906812	19909627	+	1074	3	lncNAT
chr04	MSTRG.15980	MSTRG.15980.1	20178232	20178431	-	200	1	lincRNA
chr04	MSTRG.15981	MSTRG.15981.1	20190149	20191160	+	1012	1	lincRNA
chr04	MSTRG.16005	MSTRG.16005.1	20245019	20246046	+	1028	1	lncNAT
chr04	MSTRG.16036	MSTRG.16036.1	20495941	20497031	-	780	4	lncNAT
chr04	MSTRG.16081	MSTRG.16081.1	20820971	20821313	-	226	2	lincRNA
chr04	MSTRG.16100	MSTRG.16100.1	20930352	20930552	-	201	1	lincRNA
chr04	MSTRG.16105	MSTRG.16105.1	20941095	20942688	+	1552	2	lncNAT
chr04	MSTRG.16148	MSTRG.16148.1	21447225	21447436	-	212	1	lincRNA
chr04	MSTRG.16152	MSTRG.16152.1	21455421	21456064	+	644	1	lncNAT
chr04	MSTRG.16156	MSTRG.16156.1	21466623	21468628	+	595	2	lncNAT
chr04	MSTRG.16158	MSTRG.16158.1	21495784	21498554	+	988	3	lincRNA
chr04	MSTRG.16159	MSTRG.16159.1	21501462	21503440	+	845	2	lincRNA
chr04	MSTRG.16206	MSTRG.16206.1	21826827	21827820	+	994	1	lncNAT
chr04	MSTRG.16229	MSTRG.16229.1	22073812	22074210	+	399	1	lincRNA
chr04	MSTRG.16251	MSTRG.16251.1	22182497	22186910	-	2830	9	lncNAT
chr04	MSTRG.16256	MSTRG.16256.1	22203045	22203939	+	811	2	lncNAT
chr04	MSTRG.16305	MSTRG.16305.1	22370070	22373550	-	501	3	lncNAT
chr04	MSTRG.16320	MSTRG.16320.1	22428837	22431749	-	1192	6	lncNAT
chr04	MSTRG.16361	MSTRG.16361.1	22814187	22815161	-	975	1	lncNAT
chr04	MSTRG.16367	MSTRG.16367.1	22829081	22831696	-	2525	2	lncNAT
chr04	MSTRG.16369	MSTRG.16369.1	22831116	22832121	+	1006	1	lncNAT
chr04	MSTRG.16458	MSTRG.16458.1	23360016	23361645	+	413	2	lncNAT
chr04	MSTRG.16487	MSTRG.16487.1	23590855	23591425	+	571	1	lincRNA
chr04	MSTRG.16578	MSTRG.16578.1	24103066	24105183	+	1307	2	lncNAT
chr04	MSTRG.16585	MSTRG.16585.1	24139354	24142342	+	685	3	lncNAT
chr04	MSTRG.16664	MSTRG.16664.1	24672504	24673184	-	681	1	lincRNA
chr04	MSTRG.16675	MSTRG.16675.1	24721143	24722671	+	479	2	lncNAT
chr04	MSTRG.16706	MSTRG.16706.1	24882291	24884927	+	1304	4	lncNAT
chr04	MSTRG.16704	MSTRG.16704.1	24889504	24891481	-	1884	2	lncNAT
chr04	MSTRG.16729	MSTRG.16729.1	24983353	24986305	-	785	2	lincRNA
chr04	MSTRG.16769	MSTRG.16769.1	25270366	25271836	-	1471	1	lincRNA
chr04	MSTRG.16790	MSTRG.16790.1	25396915	25399816	-	728	4	lncNAT
chr04	MSTRG.16799	MSTRG.16799.1	25443031	25444643	-	1235	4	lincRNA
chr04	MSTRG.16901	MSTRG.16901.1	26160169	26161024	-	856	1	lncNAT
chr04	MSTRG.16989	MSTRG.16989.1	26664601	26668488	+	1420	5	lncNAT
chr04	MSTRG.17010	MSTRG.17010.1	26788986	26789374	+	389	1	lincRNA
chr04	MSTRG.17044	MSTRG.17044.1	27049130	27052000	+	2871	1	lincRNA
chr04	MSTRG.17048	MSTRG.17048.1	27124204	27125551	-	1231	2	lncNAT
chr04	MSTRG.17052	MSTRG.17052.1	27160873	27163180	-	2061	2	lincRNA
chr04	MSTRG.17066	MSTRG.17066.1	27233351	27234258	-	908	1	lncNAT
chr04	MSTRG.17141	MSTRG.17141.1	27737868	27738656	+	789	1	lincRNA
chr04	MSTRG.17174	MSTRG.17174.1	27996940	27999958	-	3019	1	lncNAT
chr04	MSTRG.17214	MSTRG.17214.1	28269177	28270517	-	1341	1	lincRNA
chr04	MSTRG.17224	MSTRG.17224.1	28351299	28353579	+	2281	1	lincRNA
chr04	MSTRG.17295	MSTRG.17295.1	28892449	28893926	-	1478	1	lncNAT
chr04	MSTRG.17309	MSTRG.17309.1	29065933	29066812	-	622	4	lncNAT
chr04	MSTRG.17394	MSTRG.17394.1	29629087	29629643	-	557	1	lncNAT
chr04	MSTRG.17402	MSTRG.17402.1	29658983	29660502	-	1520	1	lncNAT
chr04	MSTRG.17477	MSTRG.17477.1	30172140	30174452	+	1039	2	lncNAT
chr04	MSTRG.17523	MSTRG.17523.1	30456569	30456918	+	350	1	lincRNA
chr04	MSTRG.17588	MSTRG.17588.1	30938827	30940267	-	1441	1	lncNAT
chr04	MSTRG.17623	MSTRG.17623.1	31127236	31127707	+	472	1	lincRNA
chr04	MSTRG.17636	MSTRG.17636.1	31176748	31178540	-	600	6	lncNAT
chr04	MSTRG.17701	MSTRG.17701.1	31559416	31560270	+	738	2	lincRNA
chr04	MSTRG.17704	MSTRG.17704.1	31588721	31589912	-	1192	1	lincRNA
chr04	MSTRG.17820	MSTRG.17820.1	32281894	32283026	+	949	2	lincRNA
chr04	MSTRG.17853	MSTRG.17853.1	32450478	32451807	-	1330	1	lncNAT
chr04	MSTRG.17939	MSTRG.17939.1	33030532	33032341	+	1810	1	lncNAT
chr04	MSTRG.17952	MSTRG.17952.1	33117870	33120017	-	2148	1	lncNAT
chr04	MSTRG.17958	MSTRG.17958.1	33123328	33127299	+	2083	5	lncNAT
chr04	MSTRG.17980	MSTRG.17980.1	33253855	33254464	-	610	1	lncNAT
chr04	MSTRG.17975	MSTRG.17975.1	33257216	33257829	+	614	1	lincRNA
chr04	MSTRG.17979	MSTRG.17979.1	33270466	33270806	-	341	1	lincRNA
chr04	MSTRG.17985	MSTRG.17985.1	33306566	33309425	-	601	4	lncNAT
chr04	MSTRG.18009	MSTRG.18009.1	33463225	33464783	-	1127	5	lncNAT
chr04	MSTRG.18029	MSTRG.18029.1	33624384	33630778	+	1561	13	lncNAT
chr04	MSTRG.18084	MSTRG.18084.1	34036984	34037821	+	838	1	lincRNA
chr04	MSTRG.18225	MSTRG.18225.1	34738060	34738807	-	407	4	lncNAT
chr04	MSTRG.18241	MSTRG.18241.1	34848602	34848923	-	322	1	lincRNA
chr04	MSTRG.18252	MSTRG.18252.1	34908424	34910994	+	2484	2	lncNAT
chr04	MSTRG.18319	MSTRG.18319.1	35344083	35346163	-	1924	3	lncNAT
chr04	MSTRG.18338	MSTRG.18338.1	35464475	35465438	+	964	1	lincRNA
chr05	MSTRG.18442	MSTRG.18442.1	542137	542964	-	828	1	lncNAT
chr05	MSTRG.18458	MSTRG.18458.1	605875	606761	-	663	3	lncNAT
chr05	MSTRG.18456	MSTRG.18456.1	614320	620148	-	892	3	lincRNA
chr05	MSTRG.18464	MSTRG.18464.1	679870	681160	+	1057	2	lincRNA
chr05	MSTRG.18523	MSTRG.18523.1	1000537	1002756	+	986	3	lncNAT
chr05	MSTRG.18541	MSTRG.18541.1	1155979	1160365	+	2522	8	lncNAT
chr05	MSTRG.18556	MSTRG.18556.1	1254377	1258424	-	1375	2	lncNAT
chr05	MSTRG.18590	MSTRG.18590.1	1521891	1523331	+	1351	2	lncNAT
chr05	MSTRG.18596	MSTRG.18596.1	1578577	1579926	-	225	2	lincRNA
chr05	MSTRG.18623	MSTRG.18623.1	1799430	1799688	+	259	1	lincRNA
chr05	MSTRG.18671	MSTRG.18671.1	2207523	2209396	+	801	2	lincRNA
chr05	MSTRG.18679	MSTRG.18679.1	2219657	2220625	+	729	3	lncNAT
chr05	MSTRG.18731	MSTRG.18731.1	2655640	2656458	-	819	1	lincRNA
chr05	MSTRG.18786	MSTRG.18786.1	2970879	2972970	+	1398	3	lncNAT
chr05	MSTRG.18854	MSTRG.18854.1	3506007	3506468	+	391	2	lincRNA
chr05	MSTRG.18948	MSTRG.18948.1	4412082	4413567	-	1402	2	lncNAT
chr05	MSTRG.18958	MSTRG.18958.1	4593271	4594044	+	774	1	lncNAT
chr05	MSTRG.18984	MSTRG.18984.1	4786533	4788780	-	831	2	lncNAT
chr05	MSTRG.18987	MSTRG.18987.1	4801369	4803267	-	1899	1	lincRNA
chr05	MSTRG.18992	MSTRG.18992.1	4870691	4871262	+	572	1	lincRNA
chr05	MSTRG.19000	MSTRG.19000.1	4913769	4935126	-	640	2	lncNAT
chr05	MSTRG.19100	MSTRG.19100.1	6246404	6247154	+	751	1	lincRNA
chr05	MSTRG.19116	MSTRG.19116.1	6397209	6400759	+	2445	2	lincRNA
chr05	MSTRG.19189	MSTRG.19189.1	7069539	7070559	-	1021	1	lncNAT
chr05	MSTRG.19227	MSTRG.19227.1	7533683	7534800	+	1118	1	lncNAT
chr05	MSTRG.19256	MSTRG.19256.1	7983810	7984777	+	968	1	lincRNA
chr05	MSTRG.19263	MSTRG.19263.1	8040198	8042819	+	1494	3	lincRNA
chr05	MSTRG.19294	MSTRG.19294.1	8578884	8580210	-	917	2	lincRNA
chr05	MSTRG.19359	MSTRG.19359.1	9533065	9534591	+	1527	1	lincRNA
chr05	MSTRG.19370	MSTRG.19370.1	10031254	10031557	+	304	1	lincRNA
chr05	MSTRG.19379	MSTRG.19379.1	10534041	10534513	+	448	2	lncNAT
chr05	MSTRG.19451	MSTRG.19451.1	12585600	12586249	-	650	1	lincRNA
chr05	MSTRG.19464	MSTRG.19464.1	12926387	12931361	+	1382	5	lincRNA
chr05	MSTRG.19470	MSTRG.19470.1	12994041	12997637	+	2105	7	lincRNA
chr05	MSTRG.19495	MSTRG.19495.1	13336986	13337593	-	608	1	lincRNA
chr05	MSTRG.19509	MSTRG.19509.1	13491768	13492289	+	522	1	lincRNA
chr05	MSTRG.19512	MSTRG.19512.1	13554121	13556325	+	2205	1	lincRNA
chr05	MSTRG.19550	MSTRG.19550.1	14161392	14165562	-	1609	11	lncNAT
chr05	MSTRG.19581	MSTRG.19581.1	14659175	14660057	-	883	1	lincRNA
chr05	MSTRG.19612	MSTRG.19612.1	14934980	14936078	-	1099	1	lincRNA
chr05	MSTRG.19619	MSTRG.19619.1	15028364	15028738	+	375	1	lincRNA
chr05	MSTRG.19636	MSTRG.19636.1	15132710	15133613	+	904	1	lncNAT
chr05	MSTRG.19667	MSTRG.19667.1	15588161	15588400	-	240	1	lincRNA
chr05	MSTRG.19707	MSTRG.19707.1	16150266	16152711	-	2039	5	lncNAT
chr05	MSTRG.19756	MSTRG.19756.1	16732596	16733267	-	672	1	lincRNA
chr05	MSTRG.19791	MSTRG.19791.1	17119027	17121709	-	1456	3	lincRNA
chr05	MSTRG.19801	MSTRG.19801.1	17197484	17198577	-	1094	1	lncNAT
chr05	MSTRG.19829	MSTRG.19829.1	17519396	17519603	-	208	1	lincRNA
chr05	MSTRG.19853	MSTRG.19853.1	17707274	17707498	+	225	1	lincRNA
chr05	MSTRG.19873	MSTRG.19873.1	17846080	17847487	-	1408	1	lincRNA
chr05	MSTRG.19904	MSTRG.19904.1	18106442	18108050	+	1609	1	lncNAT
chr05	MSTRG.19962	MSTRG.19962.1	18736104	18736961	+	858	1	lincRNA
chr05	MSTRG.20019	MSTRG.20019.1	19226204	19227332	+	1129	1	lncNAT
chr05	MSTRG.20037	MSTRG.20037.1	19406587	19406957	+	371	1	lincRNA
chr05	MSTRG.20047	MSTRG.20047.1	19409788	19413419	-	822	7	lncNAT
chr05	MSTRG.20042	MSTRG.20042.1	19441136	19441818	+	351	2	lincRNA
chr05	MSTRG.20074	MSTRG.20074.1	19680742	19681269	-	339	2	lincRNA
chr05	MSTRG.20076	MSTRG.20076.1	19697367	19697915	-	549	1	lincRNA
chr05	MSTRG.20102	MSTRG.20102.1	19902264	19904873	+	1163	3	lincRNA
chr05	MSTRG.20162	MSTRG.20162.1	20438510	20440275	-	1366	4	lncNAT
chr05	MSTRG.20169	MSTRG.20169.1	20506816	20507393	+	578	1	lincRNA
chr05	MSTRG.20204	MSTRG.20204.1	20792460	20794286	+	1827	1	lncNAT
chr05	MSTRG.20236	MSTRG.20236.1	21060008	21060495	+	488	1	lincRNA
chr05	MSTRG.20273	MSTRG.20273.1	21320969	21321853	+	885	1	lincRNA
chr05	MSTRG.20277	MSTRG.20277.1	21332121	21333389	-	1269	1	lincRNA
chr05	MSTRG.20307	MSTRG.20307.1	21564673	21565137	+	465	1	lincRNA
chr05	MSTRG.20338	MSTRG.20338.1	21835991	21837694	-	1021	3	lncNAT
chr05	MSTRG.20358	MSTRG.20358.1	21963780	21966196	+	2305	2	lncNAT
chr05	MSTRG.20356	MSTRG.20356.1	21968199	21971422	-	3224	1	lncNAT
chr05	MSTRG.20360	MSTRG.20360.1	22001125	22003438	+	2108	2	lincRNA
chr05	MSTRG.20449	MSTRG.20449.1	22656626	22658085	+	1384	2	lncNAT
chr05	MSTRG.20458	MSTRG.20458.1	22739762	22741155	+	1394	1	lincRNA
chr05	MSTRG.20541	MSTRG.20541.1	23259233	23260630	-	1398	1	lincRNA
chr05	MSTRG.20574	MSTRG.20574.1	23510019	23511106	-	1088	1	lncNAT
chr05	MSTRG.20587	MSTRG.20587.1	23617292	23618310	-	1019	1	lncNAT
chr05	MSTRG.20671	MSTRG.20671.1	24203276	24203710	-	435	1	lincRNA
chr05	MSTRG.20674	MSTRG.20674.1	24221276	24229143	-	1238	5	lincRNA
chr05	MSTRG.20701	MSTRG.20701.1	24371214	24374700	-	1398	2	lncNAT
chr05	MSTRG.20711	MSTRG.20711.1	24443962	24445235	+	1274	1	lncNAT
chr05	MSTRG.20717	MSTRG.20717.1	24492201	24492837	-	637	1	lincRNA
chr05	MSTRG.20719	MSTRG.20719.1	24494818	24496212	+	1395	1	lincRNA
chr05	MSTRG.20778	MSTRG.20778.1	24912997	24915022	+	2026	1	lncNAT
chr05	MSTRG.20780	MSTRG.20780.1	24958752	24959980	-	492	4	lincRNA
chr05	MSTRG.20782	MSTRG.20782.1	24969245	24970372	+	1128	1	lincRNA
chr05	MSTRG.20800	MSTRG.20800.1	25164355	25166358	-	786	3	lncNAT
chr05	MSTRG.20907	MSTRG.20907.1	25986182	25993663	-	226	2	lincRNA
chr05	MSTRG.20921	MSTRG.20921.1	26094754	26095849	-	1001	2	lncNAT
chr05	MSTRG.21069	MSTRG.21069.1	26891042	26892766	-	302	2	lncNAT
chr05	MSTRG.21074	MSTRG.21074.1	26927548	26928887	-	1037	3	lncNAT
chr05	MSTRG.21100	MSTRG.21100.1	27101493	27102443	+	951	1	lincRNA
chr05	MSTRG.21116	MSTRG.21116.1	27179332	27183777	+	955	7	lncNAT
chr05	MSTRG.21166	MSTRG.21166.1	27492033	27492655	-	472	2	lincRNA
chr05	MSTRG.21186	MSTRG.21186.1	27607991	27608940	+	950	1	lincRNA
chr05	MSTRG.21233	MSTRG.21233.1	27878570	27879596	-	821	3	lncNAT
chr05	MSTRG.21244	MSTRG.21244.1	27949175	27950443	+	1269	1	lncNAT
chr05	MSTRG.21252	MSTRG.21252.1	27987891	27988557	-	667	1	lincRNA
chr05	MSTRG.21268	MSTRG.21268.1	28080399	28082856	-	1227	2	lncNAT
chr05	MSTRG.21320	MSTRG.21320.1	28376059	28376818	-	760	1	lincRNA
chr05	MSTRG.21348	MSTRG.21348.1	28613015	28615720	-	2614	2	lincRNA
chr05	MSTRG.21494	MSTRG.21494.1	29356063	29359202	-	1620	6	lncNAT
chr05	MSTRG.21511	MSTRG.21511.1	29496894	29499436	+	834	6	lncNAT
chr06	MSTRG.21562	MSTRG.21562.1	149347	150241	+	895	1	lncNAT
chr06	MSTRG.21579	MSTRG.21579.1	216586	218072	+	894	4	lncNAT
chr06	MSTRG.21611	MSTRG.21611.1	416244	418467	-	1008	2	lincRNA
chr06	MSTRG.21625	MSTRG.21625.1	522862	527871	-	5010	1	lncNAT
chr06	MSTRG.21645	MSTRG.21645.1	683454	686634	-	1807	3	lincRNA
chr06	MSTRG.21655	MSTRG.21655.1	783492	783965	-	394	2	lincRNA
chr06	MSTRG.21702	MSTRG.21702.1	933356	1003935	+	370	2	lncNAT
chr06	MSTRG.21793	MSTRG.21793.1	1642645	1643889	+	1156	2	lncNAT
chr06	MSTRG.21801	MSTRG.21801.1	1714687	1714980	-	294	1	lincRNA
chr06	MSTRG.21915	MSTRG.21915.1	2351596	2352371	+	776	1	lincRNA
chr06	MSTRG.22063	MSTRG.22063.1	3119965	3120366	-	402	1	lincRNA
chr06	MSTRG.22098	MSTRG.22098.1	3314119	3315294	-	887	4	lncNAT
chr06	MSTRG.22327	MSTRG.22327.1	4918725	4919281	-	557	1	lincRNA
chr06	MSTRG.22353	MSTRG.22353.1	5071214	5073861	+	2648	1	lncNAT
chr06	MSTRG.22357	MSTRG.22357.1	5099561	5100251	-	691	1	lincRNA
chr06	MSTRG.22387	MSTRG.22387.1	5292942	5293397	+	456	1	lncNAT
chr06	MSTRG.22397	MSTRG.22397.1	5381233	5382574	-	1342	1	lincRNA
chr06	MSTRG.22401	MSTRG.22401.1	5408659	5409865	-	1207	1	lncNAT
chr06	MSTRG.22465	MSTRG.22465.1	5892427	5896564	+	697	2	lncNAT
chr06	MSTRG.22512	MSTRG.22512.1	6334740	6335840	+	1009	2	lincRNA
chr06	MSTRG.22517	MSTRG.22517.1	6395274	6397207	+	955	2	lncNAT
chr06	MSTRG.22548	MSTRG.22548.1	6619059	6620248	+	1083	2	lincRNA
chr06	MSTRG.22565	MSTRG.22565.1	6712782	6713522	-	741	1	lincRNA
chr06	MSTRG.22584	MSTRG.22584.1	6816406	6819793	+	1631	2	lncNAT
chr06	MSTRG.22646	MSTRG.22646.1	7230126	7230927	-	802	1	lncNAT
chr06	MSTRG.22654	MSTRG.22654.1	7272103	7274671	-	1767	3	lincRNA
chr06	MSTRG.22675	MSTRG.22675.1	7517876	7518116	+	241	1	lincRNA
chr06	MSTRG.22729	MSTRG.22729.1	8069181	8070423	+	1243	1	lncNAT
chr06	MSTRG.22767	MSTRG.22767.1	8720686	8722924	-	456	5	lncNAT
chr06	MSTRG.22770	MSTRG.22770.1	8751346	8752640	+	922	4	lncNAT
chr06	MSTRG.22821	MSTRG.22821.1	9225835	9226464	-	630	1	lincRNA
chr06	MSTRG.22851	MSTRG.22851.1	9713888	9714880	-	993	1	lincRNA
chr06	MSTRG.22862	MSTRG.22862.1	9874405	9874614	-	210	1	lincRNA
chr06	MSTRG.22872	MSTRG.22872.1	10095986	10097124	-	1139	1	lincRNA
chr06	MSTRG.22914	MSTRG.22914.1	10699186	10700884	+	1362	2	lncNAT
chr06	MSTRG.22982	MSTRG.22982.1	11287730	11288733	-	1004	1	lncNAT
chr06	MSTRG.22980	MSTRG.22980.1	11298047	11300253	-	2207	1	lincRNA
chr06	MSTRG.23028	MSTRG.23028.1	11967255	11968381	+	1127	1	lincRNA
chr06	MSTRG.23071	MSTRG.23071.1	12431750	12432488	+	639	2	lncNAT
chr06	MSTRG.23076	MSTRG.23076.1	12452400	12454168	-	1475	4	lncNAT
chr06	MSTRG.23097	MSTRG.23097.1	12745904	12746378	+	475	1	lincRNA
chr06	MSTRG.23119	MSTRG.23119.1	13041805	13043016	-	1212	1	lncNAT
chr06	MSTRG.23125	MSTRG.23125.1	13155885	13156131	+	247	1	lincRNA
chr06	MSTRG.23153	MSTRG.23153.1	13465938	13470482	-	1269	2	lincRNA
chr06	MSTRG.23171	MSTRG.23171.1	13685422	13686169	-	748	1	lncNAT
chr06	MSTRG.23195	MSTRG.23195.1	14117665	14118582	+	918	1	lincRNA
chr06	MSTRG.23223	MSTRG.23223.1	14790195	14790893	-	699	1	lincRNA
chr06	MSTRG.23229	MSTRG.23229.1	14968752	14969297	-	546	1	lincRNA
chr06	MSTRG.23233	MSTRG.23233.1	15174999	15182260	-	890	3	lincRNA
chr06	MSTRG.23290	MSTRG.23290.1	16011358	16032452	-	1870	6	lncNAT
chr06	MSTRG.23320	MSTRG.23320.1	16534383	16535418	-	1036	1	lincRNA
chr06	MSTRG.23336	MSTRG.23336.1	16804274	16805490	+	1217	1	lincRNA
chr06	MSTRG.23369	MSTRG.23369.1	17218054	17219105	-	1052	1	lincRNA
chr06	MSTRG.23383	MSTRG.23383.1	17380240	17381178	-	645	2	lncNAT
chr06	MSTRG.23429	MSTRG.23429.1	18027225	18027688	-	464	1	lincRNA
chr06	MSTRG.23457	MSTRG.23457.1	18821420	18822058	-	331	2	lincRNA
chr06	MSTRG.23465	MSTRG.23465.1	18984987	18985780	-	794	1	lincRNA
chr06	MSTRG.23469	MSTRG.23469.1	19080877	19096579	-	724	3	lincRNA
chr06	MSTRG.23470	MSTRG.23470.1	19172165	19173317	+	1153	1	lincRNA
chr06	MSTRG.23482	MSTRG.23482.1	19277414	19277861	+	448	1	lincRNA
chr06	MSTRG.23496	MSTRG.23496.1	19455173	19456726	+	634	3	lincRNA
chr06	MSTRG.23606	MSTRG.23606.1	20762915	20766580	+	965	2	lincRNA
chr06	MSTRG.23630	MSTRG.23630.1	20924755	20925808	-	1054	1	lincRNA
chr06	MSTRG.23718	MSTRG.23718.1	21928523	21930752	-	2230	1	lincRNA
chr06	MSTRG.23786	MSTRG.23786.1	22613999	22617423	-	762	2	lncNAT
chr06	MSTRG.23792	MSTRG.23792.1	22740582	22741781	+	1052	2	lincRNA
chr06	MSTRG.23793	MSTRG.23793.1	22766534	22767582	-	1049	1	lncNAT
chr06	MSTRG.23804	MSTRG.23804.1	22939276	22939526	-	251	1	lincRNA
chr06	MSTRG.23815	MSTRG.23815.1	23013076	23014890	-	1003	2	lincRNA
chr06	MSTRG.23816	MSTRG.23816.1	23016922	23017334	-	413	1	lincRNA
chr06	MSTRG.23858	MSTRG.23858.1	23401060	23401372	-	313	1	lincRNA
chr06	MSTRG.23862	MSTRG.23862.1	23454631	23454929	+	299	1	lincRNA
chr06	MSTRG.23871	MSTRG.23871.1	23515878	23516310	+	433	1	lincRNA
chr06	MSTRG.23883	MSTRG.23883.1	23559674	23561897	-	922	6	lncNAT
chr06	MSTRG.23897	MSTRG.23897.1	23732629	23734374	-	1109	4	lncNAT
chr06	MSTRG.23907	MSTRG.23907.1	23853596	23860221	+	3715	4	lncNAT
chr06	MSTRG.23983	MSTRG.23983.1	24394244	24394996	+	753	1	lincRNA
chr06	MSTRG.24004	MSTRG.24004.1	24586157	24586881	-	725	1	lncNAT
chr06	MSTRG.24010	MSTRG.24010.1	24729398	24731139	+	1742	1	lincRNA
chr06	MSTRG.24011	MSTRG.24011.1	24768169	24768397	-	229	1	lincRNA
chr06	MSTRG.24052	MSTRG.24052.1	25075302	25076501	+	411	3	lncNAT
chr06	MSTRG.24061	MSTRG.24061.1	25167227	25169000	+	1774	1	lincRNA
chr06	MSTRG.24081	MSTRG.24081.1	25322811	25323677	-	867	1	lincRNA
chr06	MSTRG.24095	MSTRG.24095.1	25528156	25529917	+	1676	2	lincRNA
chr06	MSTRG.24118	MSTRG.24118.1	25764060	25764366	+	307	1	lincRNA
chr06	MSTRG.24130	MSTRG.24130.1	25905749	25906728	+	980	1	lncNAT
chr06	MSTRG.24139	MSTRG.24139.1	25962629	25963464	+	836	1	lncNAT
chr06	MSTRG.24216	MSTRG.24216.1	26442600	26444812	-	854	3	lncNAT
chr06	MSTRG.24240	MSTRG.24240.1	26646373	26648155	+	1174	3	lncNAT
chr06	MSTRG.24242	MSTRG.24242.1	26650218	26652439	+	1929	2	lncNAT
chr06	MSTRG.24269	MSTRG.24269.1	26843005	26844643	+	1552	2	lncNAT
chr06	MSTRG.24280	MSTRG.24280.1	26986406	26986629	-	224	1	lincRNA
chr06	MSTRG.24335	MSTRG.24335.1	27346002	27349985	+	2490	4	lincRNA
chr06	MSTRG.24454	MSTRG.24454.1	28281415	28282127	+	605	2	lncNAT
chr06	MSTRG.24466	MSTRG.24466.1	28388402	28389625	+	1115	2	lncNAT
chr06	MSTRG.24475	MSTRG.24475.1	28451403	28451997	-	595	1	lincRNA
chr06	MSTRG.24493	MSTRG.24493.1	28542797	28543075	-	279	1	lincRNA
chr06	MSTRG.24503	MSTRG.24503.1	28617351	28620288	-	858	3	lncNAT
chr06	MSTRG.24530	MSTRG.24530.1	28758468	28759486	-	975	2	lncNAT
chr06	MSTRG.24745	MSTRG.24745.1	30279625	30281694	+	463	5	lncNAT
chr06	MSTRG.24751	MSTRG.24751.1	30338545	30339454	+	910	1	lncNAT
chr06	MSTRG.24786	MSTRG.24786.1	30515820	30516540	-	721	1	lincRNA
chr06	MSTRG.24817	MSTRG.24817.1	30694263	30694471	+	209	1	lincRNA
chr06	MSTRG.24867	MSTRG.24867.1	30993285	30995150	-	943	8	lncNAT
chr07	MSTRG.24913	MSTRG.24913.1	21497	22202	-	706	1	lincRNA
chr07	MSTRG.24930	MSTRG.24930.1	226554	226919	-	366	1	lincRNA
chr07	MSTRG.24946	MSTRG.24946.1	305976	306905	-	794	2	lncNAT
chr07	MSTRG.24978	MSTRG.24978.1	523801	526023	+	1086	3	lncNAT
chr07	MSTRG.24981	MSTRG.24981.1	547582	548073	+	382	2	lincRNA
chr07	MSTRG.24985	MSTRG.24985.1	589470	594620	-	4876	4	lincRNA
chr07	MSTRG.25012	MSTRG.25012.1	797409	799042	-	717	3	lncNAT
chr07	MSTRG.25214	MSTRG.25214.1	2193706	2197049	-	1567	10	lncNAT
chr07	MSTRG.25211	MSTRG.25211.1	2243663	2245721	+	647	3	lincRNA
chr07	MSTRG.25221	MSTRG.25221.1	2307511	2308316	-	806	1	lincRNA
chr07	MSTRG.25237	MSTRG.25237.1	2546422	2547408	-	752	3	lncNAT
chr07	MSTRG.25257	MSTRG.25257.1	2726892	2728084	+	1193	1	lncNAT
chr07	MSTRG.25275	MSTRG.25275.1	2898334	2898574	-	241	1	lincRNA
chr07	MSTRG.25316	MSTRG.25316.1	3280275	3280822	-	333	3	lincRNA
chr07	MSTRG.25325	MSTRG.25325.1	3332888	3334769	+	1882	1	lncNAT
chr07	MSTRG.25355	MSTRG.25355.1	3572922	3574104	+	1183	1	lncNAT
chr07	MSTRG.25369	MSTRG.25369.1	3662246	3663407	-	1162	1	lncNAT
chr07	MSTRG.25488	MSTRG.25488.1	4567572	4568479	+	908	1	lncNAT
chr07	MSTRG.25491	MSTRG.25491.1	4574242	4576326	+	904	3	lncNAT
chr07	MSTRG.25521	MSTRG.25521.1	4774874	4776576	+	1103	2	lncNAT
chr07	MSTRG.25567	MSTRG.25567.1	5194967	5195852	-	886	1	lincRNA
chr07	MSTRG.25581	MSTRG.25581.1	5313446	5318037	-	1222	3	lncNAT
chr07	MSTRG.25593	MSTRG.25593.1	5478198	5479679	+	1482	1	lincRNA
chr07	MSTRG.25617	MSTRG.25617.1	5655068	5657039	-	487	4	lncNAT
chr07	MSTRG.25848	MSTRG.25848.1	8361121	8361651	+	531	1	lincRNA
chr07	MSTRG.25906	MSTRG.25906.1	9562015	9562341	+	327	1	lincRNA
chr07	MSTRG.25908	MSTRG.25908.1	9566088	9566908	+	781	2	lincRNA
chr07	MSTRG.25909	MSTRG.25909.1	9596602	9596826	-	225	1	lincRNA
chr07	MSTRG.25985	MSTRG.25985.1	11023863	11024953	-	1091	1	lincRNA
chr07	MSTRG.25996	MSTRG.25996.1	11234155	11235117	+	873	2	lincRNA
chr07	MSTRG.26011	MSTRG.26011.1	11386439	11387397	-	403	2	lincRNA
chr07	MSTRG.26056	MSTRG.26056.1	12620092	12621987	-	1896	1	lincRNA
chr07	MSTRG.26084	MSTRG.26084.1	13053523	13055292	-	1770	1	lncNAT
chr07	MSTRG.26161	MSTRG.26161.1	14533313	14534383	-	831	3	lncNAT
chr07	MSTRG.26185	MSTRG.26185.1	15092680	15092955	+	276	1	lincRNA
chr07	MSTRG.26186	MSTRG.26186.1	15187121	15191422	-	1956	4	lincRNA
chr07	MSTRG.26279	MSTRG.26279.1	16454568	16455874	+	1069	4	lincRNA
chr07	MSTRG.26290	MSTRG.26290.1	16674222	16675326	-	1105	1	lncNAT
chr07	MSTRG.26316	MSTRG.26316.1	17016267	17017113	-	821	2	lincRNA
chr07	MSTRG.26348	MSTRG.26348.1	17497191	17497727	-	537	1	lncNAT
chr07	MSTRG.26352	MSTRG.26352.1	17594040	17595038	+	674	2	lincRNA
chr07	MSTRG.26429	MSTRG.26429.1	18335077	18337842	+	1147	4	lncNAT
chr07	MSTRG.26457	MSTRG.26457.1	18662690	18663020	+	331	1	lincRNA
chr07	MSTRG.26496	MSTRG.26496.1	19154939	19155345	+	407	1	lincRNA
chr07	MSTRG.26516	MSTRG.26516.1	19375249	19376223	+	975	1	lincRNA
chr07	MSTRG.26550	MSTRG.26550.1	19655658	19658007	+	2350	1	lncNAT
chr07	MSTRG.26567	MSTRG.26567.1	19887267	19888283	+	1017	1	lncNAT
chr07	MSTRG.26636	MSTRG.26636.1	20492534	20492761	+	228	1	lincRNA
chr07	MSTRG.26639	MSTRG.26639.1	20500393	20501437	+	1045	1	lincRNA
chr07	MSTRG.26657	MSTRG.26657.1	20724309	20726158	-	1772	2	lncNAT
chr07	MSTRG.26660	MSTRG.26660.1	20733160	20735422	+	980	5	lncNAT
chr07	MSTRG.26677	MSTRG.26677.1	20897063	20897651	-	287	2	lincRNA
chr07	MSTRG.26707	MSTRG.26707.1	21093824	21094783	+	440	2	lincRNA
chr07	MSTRG.26762	MSTRG.26762.1	21505699	21509630	-	975	3	lncNAT
chr07	MSTRG.26771	MSTRG.26771.1	21574644	21575966	-	696	3	lncNAT
chr07	MSTRG.26799	MSTRG.26799.1	21788156	21789642	+	947	4	lncNAT
chr07	MSTRG.26797	MSTRG.26797.1	21795680	21796602	+	923	1	lincRNA
chr07	MSTRG.26819	MSTRG.26819.1	21935176	21937402	+	2227	1	lincRNA
chr07	MSTRG.26849	MSTRG.26849.1	22182203	22182658	+	456	1	lincRNA
chr07	MSTRG.26854	MSTRG.26854.1	22184288	22187155	-	1465	5	lncNAT
chr07	MSTRG.26869	MSTRG.26869.1	22316270	22318225	+	1584	2	lncNAT
chr07	MSTRG.26928	MSTRG.26928.1	22722762	22725905	-	3052	3	lincRNA
chr07	MSTRG.26971	MSTRG.26971.1	23014798	23045598	+	959	2	lncNAT
chr07	MSTRG.27014	MSTRG.27014.1	23272138	23272649	-	512	1	lncNAT
chr07	MSTRG.27201	MSTRG.27201.1	24492897	24493353	+	457	1	lincRNA
chr07	MSTRG.27207	MSTRG.27207.1	24516326	24517706	+	505	3	lncNAT
chr07	MSTRG.27251	MSTRG.27251.1	24904653	24905405	+	753	1	lncNAT
chr07	MSTRG.27276	MSTRG.27276.1	25036646	25039079	+	596	4	lncNAT
chr07	MSTRG.27311	MSTRG.27311.1	25348061	25350279	-	1357	5	lncNAT
chr07	MSTRG.27323	MSTRG.27323.1	25446455	25447202	-	748	1	lncNAT
chr07	MSTRG.27341	MSTRG.27341.1	25580772	25582073	+	1302	1	lincRNA
chr07	MSTRG.27374	MSTRG.27374.1	25761911	25765401	+	614	2	lncNAT
chr07	MSTRG.27417	MSTRG.27417.1	26059399	26060411	+	784	2	lncNAT
chr07	MSTRG.27419	MSTRG.27419.1	26061475	26063213	+	1223	2	lncNAT
chr07	MSTRG.27426	MSTRG.27426.1	26173482	26174463	-	982	1	lncNAT
chr07	MSTRG.27477	MSTRG.27477.1	26483513	26485262	+	734	3	lncNAT
chr07	MSTRG.27577	MSTRG.27577.1	27165427	27165657	-	231	1	lincRNA
chr07	MSTRG.27592	MSTRG.27592.1	27419194	27419517	-	324	1	lincRNA
chr07	MSTRG.27648	MSTRG.27648.1	27723001	27725042	+	1345	6	lncNAT
chr07	MSTRG.27650	MSTRG.27650.1	27725280	27727903	+	1036	8	lncNAT
chr07	MSTRG.27668	MSTRG.27668.1	27890283	27891312	+	911	2	lncNAT
chr07	MSTRG.27675	MSTRG.27675.1	27918552	27921249	+	764	4	lncNAT
chr07	MSTRG.27708	MSTRG.27708.1	28075574	28077643	+	786	8	lncNAT
chr07	MSTRG.27732	MSTRG.27732.1	28238407	28239564	-	1158	1	lincRNA
chr07	MSTRG.27766	MSTRG.27766.1	28415973	28416676	-	704	1	lincRNA
chr07	MSTRG.27774	MSTRG.27774.1	28458844	28462436	-	2125	3	lincRNA
chr07	MSTRG.27791	MSTRG.27791.1	28500917	28502253	-	575	2	lncNAT
chr07	MSTRG.27819	MSTRG.27819.1	28713003	28713699	+	697	1	lincRNA
chr07	MSTRG.27821	MSTRG.27821.1	28740032	28741205	-	1174	1	lincRNA
chr07	MSTRG.27865	MSTRG.27865.1	29008780	29009975	-	1114	2	lncNAT
chr07	MSTRG.27909	MSTRG.27909.1	29285519	29288620	-	902	3	lincRNA
chr07	MSTRG.27915	MSTRG.27915.1	29328833	29330047	+	945	2	lincRNA
chr07	MSTRG.27937	MSTRG.27937.1	29460224	29461775	-	1552	1	lncNAT
chr07	MSTRG.27949	MSTRG.27949.1	29515256	29516522	+	1170	2	lncNAT
chr07	MSTRG.27969	MSTRG.27969.1	29583731	29586485	+	1594	9	lncNAT
chr08	MSTRG.27991	MSTRG.27991.1	144897	145217	+	321	1	lincRNA
chr08	MSTRG.28033	MSTRG.28033.1	367656	368303	-	648	1	lncNAT
chr08	MSTRG.28059	MSTRG.28059.1	529271	529823	-	553	1	lncNAT
chr08	MSTRG.28083	MSTRG.28083.1	682649	684066	+	755	4	lncNAT
chr08	MSTRG.28102	MSTRG.28102.1	751278	753137	-	1291	6	lncNAT
chr08	MSTRG.28116	MSTRG.28116.1	904129	905632	-	653	5	lncNAT
chr08	MSTRG.28152	MSTRG.28152.1	1091277	1094683	+	1149	2	lncNAT
chr08	MSTRG.28224	MSTRG.28224.1	1675040	1676761	-	457	2	lncNAT
chr08	MSTRG.28307	MSTRG.28307.1	2318921	2319712	-	792	1	lincRNA
chr08	MSTRG.28326	MSTRG.28326.1	2679195	2679424	-	230	1	lincRNA
chr08	MSTRG.28372	MSTRG.28372.1	3117825	3118419	+	595	1	lincRNA
chr08	MSTRG.28387	MSTRG.28387.1	3224296	3227703	+	1875	4	lncNAT
chr08	MSTRG.28385	MSTRG.28385.1	3240881	3241105	-	225	1	lincRNA
chr08	MSTRG.28459	MSTRG.28459.1	3732336	3734181	-	1375	3	lncNAT
chr08	MSTRG.28455	MSTRG.28455.1	3744688	3745373	-	686	1	lncNAT
chr08	MSTRG.28481	MSTRG.28481.1	3948864	3950194	-	643	2	lncNAT
chr08	MSTRG.28479	MSTRG.28479.1	3955319	3957125	+	1807	1	lincRNA
chr08	MSTRG.28486	MSTRG.28486.1	4003740	4003992	-	253	1	lincRNA
chr08	MSTRG.28514	MSTRG.28514.1	4253988	4258585	-	388	2	lincRNA
chr08	MSTRG.28543	MSTRG.28543.1	4507579	4508282	+	601	2	lncNAT
chr08	MSTRG.28548	MSTRG.28548.1	4544759	4550871	-	2401	4	lncNAT
chr08	MSTRG.28563	MSTRG.28563.1	4667389	4667599	+	211	1	lincRNA
chr08	MSTRG.28596	MSTRG.28596.1	5165207	5165766	+	560	1	lncNAT
chr08	MSTRG.28654	MSTRG.28654.1	5559614	5560140	-	527	1	lincRNA
chr08	MSTRG.28693	MSTRG.28693.1	5806367	5808446	+	926	5	lncNAT
chr08	MSTRG.28719	MSTRG.28719.1	6094783	6095441	-	659	1	lincRNA
chr08	MSTRG.28752	MSTRG.28752.1	6291707	6292971	+	650	2	lincRNA
chr08	MSTRG.28757	MSTRG.28757.1	6324675	6325064	-	390	1	lincRNA
chr08	MSTRG.28786	MSTRG.28786.1	7268322	7269414	+	635	2	lincRNA
chr08	MSTRG.28795	MSTRG.28795.1	7464183	7464392	-	210	1	lincRNA
chr08	MSTRG.28840	MSTRG.28840.1	7956119	7957112	-	994	1	lincRNA
chr08	MSTRG.28847	MSTRG.28847.1	7981261	7988306	-	2785	3	lncNAT
chr08	MSTRG.28851	MSTRG.28851.1	8007303	8007757	+	455	1	lincRNA
chr08	MSTRG.28863	MSTRG.28863.1	8182273	8182938	+	666	1	lincRNA
chr08	MSTRG.28874	MSTRG.28874.1	8273128	8285750	+	3278	2	lncNAT
chr08	MSTRG.28885	MSTRG.28885.1	8401478	8401680	-	203	1	lincRNA
chr08	MSTRG.28904	MSTRG.28904.1	8631630	8632796	-	1167	1	lincRNA
chr08	MSTRG.28909	MSTRG.28909.1	8696418	8696983	+	566	1	lincRNA
chr08	MSTRG.28910	MSTRG.28910.1	8700182	8701062	+	881	1	lincRNA
chr08	MSTRG.28980	MSTRG.28980.1	9487341	9491933	-	2119	3	lincRNA
chr08	MSTRG.28998	MSTRG.28998.1	9926352	9926962	-	611	1	lincRNA
chr08	MSTRG.29008	MSTRG.29008.1	10084805	10088206	-	1925	4	lincRNA
chr08	MSTRG.29023	MSTRG.29023.1	10235367	10236194	-	828	1	lincRNA
chr08	MSTRG.29167	MSTRG.29167.1	12823665	12824021	-	357	1	lincRNA
chr08	MSTRG.29187	MSTRG.29187.1	13631161	13633027	-	627	3	lincRNA
chr08	MSTRG.29210	MSTRG.29210.1	14066818	14067281	-	464	1	lincRNA
chr08	MSTRG.29240	MSTRG.29240.1	14530090	14530758	-	669	1	lincRNA
chr08	MSTRG.29251	MSTRG.29251.1	14616143	14616994	-	852	1	lncNAT
chr08	MSTRG.29276	MSTRG.29276.1	15046052	15047706	-	1655	1	lincRNA
chr08	MSTRG.29314	MSTRG.29314.1	15637796	15640141	-	796	3	lncNAT
chr08	MSTRG.29331	MSTRG.29331.1	15954179	15955128	+	950	1	lincRNA
chr08	MSTRG.29334	MSTRG.29334.1	16014313	16015842	-	846	3	lincRNA
chr08	MSTRG.29340	MSTRG.29340.1	16252494	16258797	-	5097	4	lincRNA
chr08	MSTRG.29346	MSTRG.29346.1	16320133	16333419	+	1633	2	lncNAT
chr08	MSTRG.29353	MSTRG.29353.1	16458268	16464971	-	389	2	lincRNA
chr08	MSTRG.29354	MSTRG.29354.1	16482436	16486869	+	1152	4	lincRNA
chr08	MSTRG.29374	MSTRG.29374.1	16770786	16771520	-	709	2	lincRNA
chr08	MSTRG.29445	MSTRG.29445.1	17688917	17689573	-	566	2	lincRNA
chr08	MSTRG.29501	MSTRG.29501.1	18465896	18467901	-	2006	1	lincRNA
chr08	MSTRG.29510	MSTRG.29510.1	18530007	18531354	+	1348	1	lncNAT
chr08	MSTRG.29519	MSTRG.29519.1	18652261	18653193	+	933	1	lincRNA
chr08	MSTRG.29572	MSTRG.29572.1	19317454	19319522	-	1918	2	lncNAT
chr08	MSTRG.29592	MSTRG.29592.1	19522111	19527116	-	844	6	lncNAT
chr08	MSTRG.29642	MSTRG.29642.1	19928662	19929268	-	512	2	lncNAT
chr08	MSTRG.29659	MSTRG.29659.1	20164788	20165840	-	1038	3	lncNAT
chr08	MSTRG.29739	MSTRG.29739.1	20945075	20947878	+	806	3	lncNAT
chr08	MSTRG.29778	MSTRG.29778.1	21301381	21302564	-	1184	1	lincRNA
chr08	MSTRG.29810	MSTRG.29810.1	21601829	21602464	+	636	1	lincRNA
chr08	MSTRG.29813	MSTRG.29813.1	21630765	21631509	-	745	1	lincRNA
chr08	MSTRG.29844	MSTRG.29844.1	21970351	21973220	-	2870	1	lincRNA
chr08	MSTRG.29866	MSTRG.29866.1	22293731	22296493	-	808	3	lincRNA
chr08	MSTRG.30001	MSTRG.30001.1	23579831	23582163	+	529	4	lncNAT
chr08	MSTRG.30007	MSTRG.30007.1	23678987	23681777	-	1033	3	lincRNA
chr08	MSTRG.30016	MSTRG.30016.1	23719958	23722149	+	1114	3	lncNAT
chr08	MSTRG.30077	MSTRG.30077.1	24146486	24146824	+	339	1	lincRNA
chr08	MSTRG.30172	MSTRG.30172.1	24828109	24830865	+	1610	6	lncNAT
chr08	MSTRG.30215	MSTRG.30215.1	25220077	25221901	-	1825	1	lincRNA
chr08	MSTRG.30245	MSTRG.30245.1	25416166	25418704	-	1104	9	lncNAT
chr08	MSTRG.30264	MSTRG.30264.1	25579215	25579433	-	219	1	lincRNA
chr08	MSTRG.30326	MSTRG.30326.1	25953504	25954718	+	710	4	lncNAT
chr08	MSTRG.30374	MSTRG.30374.1	26279839	26280070	-	232	1	lincRNA
chr08	MSTRG.30378	MSTRG.30378.1	26298815	26299784	-	970	1	lincRNA
chr08	MSTRG.30420	MSTRG.30420.1	26554181	26557058	+	1001	3	lncNAT
chr08	MSTRG.30435	MSTRG.30435.1	26665587	26666157	+	458	2	lincRNA
chr08	MSTRG.30479	MSTRG.30479.1	26998074	26998475	-	368	2	lincRNA
chr08	MSTRG.30488	MSTRG.30488.1	27074893	27075812	+	920	1	lincRNA
chr08	MSTRG.30551	MSTRG.30551.1	27378425	27379333	+	909	1	lncNAT
chr08	MSTRG.30554	MSTRG.30554.1	27403098	27405769	-	1548	2	lncNAT
chr08	MSTRG.30647	MSTRG.30647.1	27856833	27858376	-	534	2	lncNAT
chr08	MSTRG.30684	MSTRG.30684.1	28065800	28066563	+	764	1	lincRNA
chr08	MSTRG.30721	MSTRG.30721.1	28293360	28294597	-	849	2	lncNAT
chr08	MSTRG.30742	MSTRG.30742.1	28394046	28394828	-	454	4	lncNAT
chr09	MSTRG.30750	MSTRG.30750.1	254789	255261	+	473	1	lincRNA
chr09	MSTRG.30752	MSTRG.30752.1	341093	341673	-	581	1	lincRNA
chr09	MSTRG.30767	MSTRG.30767.1	656756	658373	+	1618	1	lncNAT
chr09	MSTRG.30773	MSTRG.30773.1	742842	745183	-	833	3	lincRNA
chr09	MSTRG.30782	MSTRG.30782.1	862625	863390	-	683	2	lncNAT
chr09	MSTRG.30789	MSTRG.30789.1	920917	926110	+	931	6	lncNAT
chr09	MSTRG.30810	MSTRG.30810.1	1221147	1224787	+	1241	8	lncNAT
chr09	MSTRG.30812	MSTRG.30812.1	1239223	1241583	-	2361	1	lincRNA
chr09	MSTRG.30814	MSTRG.30814.1	1246149	1246546	-	351	2	lincRNA
chr09	MSTRG.30815	MSTRG.30815.1	1246726	1254492	-	1255	2	lincRNA
chr09	MSTRG.30862	MSTRG.30862.1	2036348	2038150	+	1071	3	lincRNA
chr09	MSTRG.30868	MSTRG.30868.1	2135701	2137237	-	1537	1	lincRNA
chr09	MSTRG.30872	MSTRG.30872.1	2226078	2227311	+	1234	1	lincRNA
chr09	MSTRG.30898	MSTRG.30898.1	2549051	2552761	-	1329	3	lncNAT
chr09	MSTRG.30918	MSTRG.30918.1	3048344	3064428	+	1060	2	lncNAT
chr09	MSTRG.30930	MSTRG.30930.1	3205787	3206883	-	1097	1	lncNAT
chr09	MSTRG.30938	MSTRG.30938.1	3377205	3377699	-	495	1	lincRNA
chr09	MSTRG.30982	MSTRG.30982.1	4042487	4045466	-	797	3	lncNAT
chr09	MSTRG.31002	MSTRG.31002.1	4334536	4334955	-	420	1	lincRNA
chr09	MSTRG.31009	MSTRG.31009.1	4427620	4428576	+	957	1	lincRNA
chr09	MSTRG.31019	MSTRG.31019.1	4532385	4532904	-	520	1	lincRNA
chr09	MSTRG.31132	MSTRG.31132.1	5890805	6164178	-	243	2	lncNAT
chr09	MSTRG.31109	MSTRG.31109.1	6184690	6186681	+	1963	2	lncNAT
chr09	MSTRG.31111	MSTRG.31111.1	6210888	6212159	+	1272	1	lincRNA
chr09	MSTRG.31121	MSTRG.31121.1	6259428	6260457	+	325	2	lncNAT
chr09	MSTRG.31124	MSTRG.31124.1	6396704	6397741	+	1038	1	lincRNA
chr09	MSTRG.31192	MSTRG.31192.1	7329780	7331513	-	405	5	lncNAT
chr09	MSTRG.31241	MSTRG.31241.1	8644335	8644857	-	384	2	lncNAT
chr09	MSTRG.31251	MSTRG.31251.1	8964731	8966354	-	1624	1	lincRNA
chr09	MSTRG.31263	MSTRG.31263.1	9356039	9357456	-	1418	1	lincRNA
chr09	MSTRG.31327	MSTRG.31327.1	9927959	9928771	-	813	1	lincRNA
chr09	MSTRG.31345	MSTRG.31345.1	10226040	10226990	-	457	2	lncNAT
chr09	MSTRG.31360	MSTRG.31360.1	10487715	10488350	+	636	1	lincRNA
chr09	MSTRG.31396	MSTRG.31396.1	10933486	10933856	-	371	1	lincRNA
chr09	MSTRG.31408	MSTRG.31408.1	11139418	11140520	-	1103	1	lincRNA
chr09	MSTRG.31420	MSTRG.31420.1	11420064	11422549	-	472	3	lincRNA
chr09	MSTRG.31440	MSTRG.31440.1	11735541	11740260	-	965	3	lncNAT
chr09	MSTRG.31477	MSTRG.31477.1	12126884	12127952	-	987	2	lncNAT
chr09	MSTRG.31493	MSTRG.31493.1	12215864	12218349	-	2486	1	lncNAT
chr09	MSTRG.31502	MSTRG.31502.1	12288968	12289799	+	832	1	lincRNA
chr09	MSTRG.31523	MSTRG.31523.1	12460076	12462551	-	1079	2	lncNAT
chr09	MSTRG.31593	MSTRG.31593.1	13266471	13267752	+	617	2	lincRNA
chr09	MSTRG.31608	MSTRG.31608.1	13611666	13612693	+	1028	1	lincRNA
chr09	MSTRG.31622	MSTRG.31622.1	13803853	13804420	-	568	1	lincRNA
chr09	MSTRG.31740	MSTRG.31740.1	14849280	14850898	-	1619	1	lncNAT
chr09	MSTRG.31758	MSTRG.31758.1	15013934	15015593	-	1660	1	lincRNA
chr09	MSTRG.31858	MSTRG.31858.1	15874073	15875237	+	1140	2	lincRNA
chr09	MSTRG.31874	MSTRG.31874.1	15959447	15962641	-	1583	3	lncNAT
chr09	MSTRG.31971	MSTRG.31971.1	16776100	16777999	-	1900	1	lincRNA
chr09	MSTRG.31988	MSTRG.31988.1	16908579	16910375	-	1797	1	lincRNA
chr09	MSTRG.32033	MSTRG.32033.1	17269172	17269990	-	819	1	lincRNA
chr09	MSTRG.32120	MSTRG.32120.1	17743079	17743928	-	298	3	lncNAT
chr09	MSTRG.32118	MSTRG.32118.1	17811991	17812284	-	294	1	lincRNA
chr09	MSTRG.32146	MSTRG.32146.1	17981166	17982225	+	1060	1	lincRNA
chr09	MSTRG.32148	MSTRG.32148.1	18001234	18003646	+	1035	2	lncNAT
chr09	MSTRG.32171	MSTRG.32171.1	18114609	18120322	-	356	2	lncNAT
chr09	MSTRG.32175	MSTRG.32175.1	18190130	18191959	-	1830	1	lincRNA
chr09	MSTRG.32248	MSTRG.32248.1	18620239	18622502	+	937	2	lincRNA
chr09	MSTRG.32311	MSTRG.32311.1	18976100	18976831	-	732	1	lincRNA
chr09	MSTRG.32344	MSTRG.32344.1	19202644	19203781	-	1138	1	lincRNA
chr09	MSTRG.32512	MSTRG.32512.1	20125587	20127385	+	606	3	lncNAT
chr09	MSTRG.32572	MSTRG.32572.1	20485131	20486694	-	1541	2	lncNAT
chr09	MSTRG.32579	MSTRG.32579.1	20529800	20532404	+	629	5	lncNAT
chr09	MSTRG.32653	MSTRG.32653.1	20988334	20990582	-	492	2	lncNAT
chr09	MSTRG.32658	MSTRG.32658.1	21029066	21029436	-	371	1	lncNAT
chr09	MSTRG.32840	MSTRG.32840.1	22141979	22143549	-	1571	1	lincRNA
chr09	MSTRG.32892	MSTRG.32892.1	22365587	22366006	+	420	1	lincRNA
chr09	MSTRG.32928	MSTRG.32928.1	22615366	22618086	-	1627	3	lincRNA
chr09	MSTRG.32937	MSTRG.32937.1	22651387	22652167	-	657	2	lncNAT
chr09	MSTRG.32989	MSTRG.32989.1	22891464	22891885	+	422	1	lincRNA
chr09	MSTRG.32999	MSTRG.32999.1	22907603	22908653	-	964	2	lncNAT
chr10	MSTRG.33012	MSTRG.33012.1	85021	85224	-	204	1	lincRNA
chr10	MSTRG.33074	MSTRG.33074.1	805864	808967	+	2116	3	lncNAT
chr10	MSTRG.33080	MSTRG.33080.1	837662	838990	-	1329	1	lncNAT
chr10	MSTRG.33086	MSTRG.33086.1	880216	880774	+	559	1	lincRNA
chr10	MSTRG.33092	MSTRG.33092.1	920168	921996	+	1829	1	lincRNA
chr10	MSTRG.33108	MSTRG.33108.1	1011481	1012919	+	466	4	lncNAT
chr10	MSTRG.33114	MSTRG.33114.1	1118264	1118937	+	674	1	lincRNA
chr10	MSTRG.33246	MSTRG.33246.1	2449614	2449982	+	369	1	lincRNA
chr10	MSTRG.33355	MSTRG.33355.1	2509319	2968009	+	568	2	lncNAT
chr10	MSTRG.33390	MSTRG.33390.1	2843316	2845229	-	1207	2	lncNAT
chr10	MSTRG.33253	MSTRG.33253.1	2993143	2993816	+	674	1	lincRNA
chr10	MSTRG.33265	MSTRG.33265.1	3068460	3069110	+	576	2	lncNAT
chr10	MSTRG.33304	MSTRG.33304.1	3633051	3634201	-	1151	1	lincRNA
chr10	MSTRG.33327	MSTRG.33327.1	3940532	3942031	+	1414	2	lncNAT
chr10	MSTRG.33335	MSTRG.33335.1	4048815	4050277	-	1463	1	lincRNA
chr10	MSTRG.33436	MSTRG.33436.1	4832067	4835007	-	672	3	lncNAT
chr10	MSTRG.33439	MSTRG.33439.1	4944424	4944997	+	574	1	lincRNA
chr10	MSTRG.33447	MSTRG.33447.1	5024336	5027803	-	2056	4	lincRNA
chr10	MSTRG.33457	MSTRG.33457.1	5252500	5255022	+	2523	1	lincRNA
chr10	MSTRG.33486	MSTRG.33486.1	5703874	5710705	-	312	2	lncNAT
chr10	MSTRG.33513	MSTRG.33513.1	6131675	6134102	+	2428	1	lincRNA
chr10	MSTRG.33523	MSTRG.33523.1	6167580	6169221	+	725	8	lncNAT
chr10	MSTRG.33571	MSTRG.33571.1	7008425	7008872	-	448	1	lincRNA
chr10	MSTRG.33574	MSTRG.33574.1	7217367	7217695	-	329	1	lincRNA
chr10	MSTRG.33578	MSTRG.33578.1	7250428	7252581	+	827	3	lincRNA
chr10	MSTRG.33590	MSTRG.33590.1	7496098	7497156	-	953	2	lncNAT
chr10	MSTRG.33599	MSTRG.33599.1	7557539	7564038	-	878	2	lncNAT
chr10	MSTRG.33605	MSTRG.33605.1	7667369	7668335	+	967	1	lincRNA
chr10	MSTRG.33622	MSTRG.33622.1	7993313	7996017	+	1868	2	lncNAT
chr10	MSTRG.33639	MSTRG.33639.1	8640465	8641305	-	841	1	lincRNA
chr10	MSTRG.33679	MSTRG.33679.1	9315129	9316321	-	1193	1	lncNAT
chr10	MSTRG.33694	MSTRG.33694.1	9550226	9550768	+	543	1	lincRNA
chr10	MSTRG.33716	MSTRG.33716.1	9994278	9995043	+	766	1	lincRNA
chr10	MSTRG.33818	MSTRG.33818.1	11361052	11361344	-	293	1	lincRNA
chr10	MSTRG.33874	MSTRG.33874.1	11955069	11956000	-	932	1	lincRNA
chr10	MSTRG.33901	MSTRG.33901.1	12299819	12300782	-	944	2	lincRNA
chr10	MSTRG.33914	MSTRG.33914.1	12782838	12783793	+	956	1	lincRNA
chr10	MSTRG.33919	MSTRG.33919.1	12798117	12803989	-	1726	3	lincRNA
chr10	MSTRG.33975	MSTRG.33975.1	13337418	13338590	-	869	2	lincRNA
chr10	MSTRG.33978	MSTRG.33978.1	13349637	13350492	-	583	2	lincRNA
chr10	MSTRG.34036	MSTRG.34036.1	14018736	14019245	-	510	1	lincRNA
chr10	MSTRG.34052	MSTRG.34052.1	14307070	14308000	-	931	1	lincRNA
chr10	MSTRG.34092	MSTRG.34092.1	14644782	14645931	+	1150	1	lincRNA
chr10	MSTRG.34106	MSTRG.34106.1	14757111	14759369	+	852	4	lncNAT
chr10	MSTRG.34116	MSTRG.34116.1	14864184	14865048	+	843	2	lncNAT
chr10	MSTRG.34142	MSTRG.34142.1	15060899	15061196	-	298	1	lincRNA
chr10	MSTRG.34246	MSTRG.34246.1	15905193	15908232	+	1121	2	lincRNA
chr10	MSTRG.34287	MSTRG.34287.1	16400109	16401815	+	1707	1	lincRNA
chr10	MSTRG.34331	MSTRG.34331.1	16868285	16868508	+	224	1	lincRNA
chr10	MSTRG.34372	MSTRG.34372.1	17172874	17173930	+	1057	1	lincRNA
chr10	MSTRG.34371	MSTRG.34371.1	17175409	17176699	-	1291	1	lincRNA
chr10	MSTRG.34375	MSTRG.34375.1	17180682	17183545	-	2600	4	lncNAT
chr10	MSTRG.34386	MSTRG.34386.1	17227377	17229202	+	568	3	lncNAT
chr10	MSTRG.34402	MSTRG.34402.1	17357646	17361914	+	4269	1	lncNAT
chr10	MSTRG.34460	MSTRG.34460.1	17917158	17917834	-	551	2	lncNAT
chr10	MSTRG.34491	MSTRG.34491.1	18223700	18227577	+	1094	2	lncNAT
chr10	MSTRG.34498	MSTRG.34498.1	18256960	18257970	-	990	2	lincRNA
chr10	MSTRG.34550	MSTRG.34550.1	18621010	18628055	+	642	2	lncNAT
chr10	MSTRG.34558	MSTRG.34558.1	18640368	18641938	-	941	2	lncNAT
chr10	MSTRG.34608	MSTRG.34608.1	18900306	18903843	-	1570	4	lncNAT
chr10	MSTRG.34830	MSTRG.34830.1	20415533	20416275	+	743	1	lncNAT
chr10	MSTRG.34846	MSTRG.34846.1	20498088	20552083	-	802	2	lncNAT
chr10	MSTRG.34861	MSTRG.34861.1	20619347	20623788	+	1289	3	lncNAT
chr10	MSTRG.34877	MSTRG.34877.1	20702115	20703525	+	1011	3	lncNAT
chr10	MSTRG.34905	MSTRG.34905.1	20863478	20872284	-	427	3	lncNAT
chr10	MSTRG.34928	MSTRG.34928.1	21035269	21039023	-	3755	1	lncNAT
chr10	MSTRG.34980	MSTRG.34980.1	21328190	21330438	-	744	3	lncNAT
chr10	MSTRG.34986	MSTRG.34986.1	21366709	21368018	-	1310	1	lincRNA
chr10	MSTRG.35021	MSTRG.35021.1	21601029	21602458	-	1430	1	lincRNA
chr10	MSTRG.35143	MSTRG.35143.1	22254691	22257134	-	1268	2	lncNAT
chr10	MSTRG.35151	MSTRG.35151.1	22288655	22289384	+	730	1	lncNAT
chr10	MSTRG.35156	MSTRG.35156.1	22296476	22297645	+	522	5	lncNAT
chr10	MSTRG.35228	MSTRG.35228.1	22774792	22778568	+	3158	3	lncNAT
chr10	MSTRG.35231	MSTRG.35231.1	22824439	22825636	-	1198	1	lincRNA
chr11	MSTRG.35327	MSTRG.35327.1	218845	219299	-	455	1	lincRNA
chr11	MSTRG.35385	MSTRG.35385.1	528034	529103	-	1070	1	lincRNA
chr11	MSTRG.35392	MSTRG.35392.1	541626	545580	-	1380	3	lincRNA
chr11	MSTRG.35411	MSTRG.35411.1	618275	620082	-	391	2	lncNAT
chr11	MSTRG.35418	MSTRG.35418.1	655367	657832	+	1501	2	lncNAT
chr11	MSTRG.35419	MSTRG.35419.1	657889	660546	+	765	2	lncNAT
chr11	MSTRG.35429	MSTRG.35429.1	715417	716508	-	986	2	lncNAT
chr11	MSTRG.35432	MSTRG.35432.1	722732	724394	-	954	2	lncNAT
chr11	MSTRG.35434	MSTRG.35434.1	725845	726943	-	1099	1	lncNAT
chr11	MSTRG.35445	MSTRG.35445.1	784438	788121	+	2600	3	lncNAT
chr11	MSTRG.35478	MSTRG.35478.1	957472	968437	+	1187	2	lncNAT
chr11	MSTRG.35770	MSTRG.35770.1	3010344	3010748	+	405	1	lincRNA
chr11	MSTRG.35802	MSTRG.35802.1	3278422	3279424	+	884	2	lncNAT
chr11	MSTRG.35820	MSTRG.35820.1	3378165	3380285	+	866	3	lncNAT
chr11	MSTRG.35834	MSTRG.35834.1	3523947	3524266	-	320	1	lincRNA
chr11	MSTRG.35908	MSTRG.35908.1	4299930	4301684	+	1118	3	lncNAT
chr11	MSTRG.35906	MSTRG.35906.1	4317608	4317828	+	221	1	lincRNA
chr11	MSTRG.35955	MSTRG.35955.1	4864880	4865857	-	978	1	lincRNA
chr11	MSTRG.35975	MSTRG.35975.1	4973177	4974911	+	747	5	lncNAT
chr11	MSTRG.36076	MSTRG.36076.1	5814297	5815739	-	1443	1	lincRNA
chr11	MSTRG.36104	MSTRG.36104.1	6107386	6108256	-	871	1	lincRNA
chr11	MSTRG.36114	MSTRG.36114.1	6147723	6148809	+	1087	1	lncNAT
chr11	MSTRG.36119	MSTRG.36119.1	6220956	6224162	+	3187	2	lincRNA
chr11	MSTRG.36170	MSTRG.36170.1	6663426	6663656	+	231	1	lincRNA
chr11	MSTRG.36270	MSTRG.36270.1	7865620	7867485	-	1866	1	lncNAT
chr11	MSTRG.36285	MSTRG.36285.1	7986847	7988225	-	1379	1	lincRNA
chr11	MSTRG.36309	MSTRG.36309.1	8362206	8363847	-	1642	1	lincRNA
chr11	MSTRG.36371	MSTRG.36371.1	9272632	9273261	-	602	2	lincRNA
chr11	MSTRG.36391	MSTRG.36391.1	9674515	9675343	-	829	1	lincRNA
chr11	MSTRG.36450	MSTRG.36450.1	10769700	10771595	+	1896	1	lncNAT
chr11	MSTRG.36456	MSTRG.36456.1	10968011	10968217	-	207	1	lincRNA
chr11	MSTRG.36502	MSTRG.36502.1	11690004	11691764	-	1761	1	lincRNA
chr11	MSTRG.36513	MSTRG.36513.1	11998455	11998725	+	271	1	lincRNA
chr11	MSTRG.36534	MSTRG.36534.1	12423935	12440865	-	1326	2	lncNAT
chr11	MSTRG.36540	MSTRG.36540.1	12598230	12605416	-	352	2	lincRNA
chr11	MSTRG.36553	MSTRG.36553.1	13028947	13032627	-	503	3	lincRNA
chr11	MSTRG.36559	MSTRG.36559.1	13237043	13237696	-	654	1	lincRNA
chr11	MSTRG.36565	MSTRG.36565.1	13443730	13445683	-	1829	3	lncNAT
chr11	MSTRG.36566	MSTRG.36566.1	13506336	13507229	+	652	3	lncNAT
chr11	MSTRG.36583	MSTRG.36583.1	13716977	13719287	-	1475	3	lincRNA
chr11	MSTRG.36644	MSTRG.36644.1	14575189	14575501	+	313	1	lincRNA
chr11	MSTRG.36669	MSTRG.36669.1	15234938	15235655	-	718	1	lincRNA
chr11	MSTRG.36689	MSTRG.36689.1	15459461	15462355	-	887	2	lncNAT
chr11	MSTRG.36725	MSTRG.36725.1	16107165	16107858	+	694	1	lincRNA
chr11	MSTRG.36746	MSTRG.36746.1	16366456	16367773	+	1318	1	lncNAT
chr11	MSTRG.36756	MSTRG.36756.1	16506764	16507922	+	1159	1	lncNAT
chr11	MSTRG.36772	MSTRG.36772.1	16889060	16890054	-	995	1	lncNAT
chr11	MSTRG.36776	MSTRG.36776.1	16917791	16919754	+	901	4	lncNAT
chr11	MSTRG.36796	MSTRG.36796.1	17115895	17116944	+	1050	1	lncNAT
chr11	MSTRG.36802	MSTRG.36802.1	17200628	17201107	+	480	1	lncNAT
chr11	MSTRG.36813	MSTRG.36813.1	17289276	17296475	-	1239	4	lncNAT
chr11	MSTRG.36825	MSTRG.36825.1	17399328	17401357	-	302	2	lincRNA
chr11	MSTRG.36857	MSTRG.36857.1	17983555	17984304	-	750	1	lincRNA
chr11	MSTRG.36903	MSTRG.36903.1	18654036	18654241	+	206	1	lincRNA
chr11	MSTRG.36975	MSTRG.36975.1	19478874	19479096	+	223	1	lincRNA
chr11	MSTRG.37015	MSTRG.37015.1	19910968	19913226	+	1030	3	lincRNA
chr11	MSTRG.37053	MSTRG.37053.1	20189368	20192465	-	3098	1	lncNAT
chr11	MSTRG.37078	MSTRG.37078.1	20433615	20437282	-	779	3	lncNAT
chr11	MSTRG.37126	MSTRG.37126.1	20879823	20880441	-	619	1	lincRNA
chr11	MSTRG.37150	MSTRG.37150.1	21224035	21224993	-	959	1	lincRNA
chr11	MSTRG.37177	MSTRG.37177.1	21585874	21586488	+	577	2	lincRNA
chr11	MSTRG.37306	MSTRG.37306.1	22660528	22662324	-	1254	4	lncNAT
chr11	MSTRG.37309	MSTRG.37309.1	22679312	22685259	+	1087	4	lncNAT
chr11	MSTRG.37332	MSTRG.37332.1	23016709	23017118	-	410	1	lincRNA
chr11	MSTRG.37339	MSTRG.37339.1	23073804	23074288	+	485	1	lincRNA
chr11	MSTRG.37361	MSTRG.37361.1	23251643	23251931	+	289	1	lincRNA
chr11	MSTRG.37373	MSTRG.37373.1	23351967	23352312	+	346	1	lincRNA
chr11	MSTRG.37384	MSTRG.37384.1	23409123	23409500	-	378	1	lncNAT
chr11	MSTRG.37408	MSTRG.37408.1	23719172	23719411	-	240	1	lincRNA
chr11	MSTRG.37436	MSTRG.37436.1	24040124	24040762	-	639	1	lincRNA
chr11	MSTRG.37447	MSTRG.37447.1	24118639	24120539	+	589	2	lncNAT
chr11	MSTRG.37461	MSTRG.37461.1	24261600	24262843	+	1244	1	lincRNA
chr11	MSTRG.37464	MSTRG.37464.1	24314247	24314473	-	227	1	lincRNA
chr11	MSTRG.37469	MSTRG.37469.1	24338969	24340875	+	1131	2	lincRNA
chr11	MSTRG.37484	MSTRG.37484.1	24590473	24591361	+	889	1	lincRNA
chr11	MSTRG.37485	MSTRG.37485.1	24602904	24604610	-	559	2	lincRNA
chr11	MSTRG.37519	MSTRG.37519.1	24941692	24942025	+	334	1	lincRNA
chr11	MSTRG.37520	MSTRG.37520.1	24942712	24943005	+	294	1	lincRNA
chr11	MSTRG.37559	MSTRG.37559.1	25321301	25324801	-	3501	1	lncNAT
chr11	MSTRG.37575	MSTRG.37575.1	25558193	25559462	-	803	2	lincRNA
chr11	MSTRG.37611	MSTRG.37611.1	25966595	25968184	-	595	3	lincRNA
chr11	MSTRG.37637	MSTRG.37637.1	26297212	26297471	+	260	1	lincRNA
chr11	MSTRG.37662	MSTRG.37662.1	26510962	26513090	+	844	5	lncNAT
chr11	MSTRG.37671	MSTRG.37671.1	26647230	26647477	-	248	1	lincRNA
chr11	MSTRG.37674	MSTRG.37674.1	26665707	26666570	+	864	1	lincRNA
chr11	MSTRG.37684	MSTRG.37684.1	26789582	26789943	+	362	1	lincRNA
chr11	MSTRG.37694	MSTRG.37694.1	26924796	26931695	-	395	2	lincRNA
chr11	MSTRG.37710	MSTRG.37710.1	27135555	27141214	+	876	3	lncNAT
chr11	MSTRG.37726	MSTRG.37726.1	27222437	27224956	-	2520	1	lncNAT
chr11	MSTRG.37752	MSTRG.37752.1	27498492	27499583	+	1092	1	lincRNA
chr11	MSTRG.37793	MSTRG.37793.1	27901142	27907160	-	588	2	lincRNA
chr11	MSTRG.37802	MSTRG.37802.1	28053686	28055884	-	977	4	lincRNA
chr11	MSTRG.37836	MSTRG.37836.1	28233002	28380826	-	403	2	lncNAT
chr11	MSTRG.37841	MSTRG.37841.1	28332683	28333254	-	572	1	lincRNA
chr11	MSTRG.37892	MSTRG.37892.1	28909579	28910054	-	476	1	lincRNA
chr11	MSTRG.37898	MSTRG.37898.1	28940496	28941121	+	626	1	lincRNA
chr11	MSTRG.37913	MSTRG.37913.1	29006525	29006937	-	413	1	lincRNA
chr12	MSTRG.37920	MSTRG.37920.1	1001	3142	-	2070	2	lncNAT
chr12	MSTRG.37942	MSTRG.37942.1	208885	209965	+	1081	1	lincRNA
chr12	MSTRG.37954	MSTRG.37954.1	283309	289264	-	396	2	lincRNA
chr12	MSTRG.37964	MSTRG.37964.1	320371	323877	+	1515	8	lncNAT
chr12	MSTRG.38005	MSTRG.38005.1	570693	571120	-	428	1	lincRNA
chr12	MSTRG.38050	MSTRG.38050.1	746157	747062	-	800	2	lncNAT
chr12	MSTRG.38049	MSTRG.38049.1	751893	753282	+	1390	1	lincRNA
chr12	MSTRG.38053	MSTRG.38053.1	760905	762502	-	885	2	lncNAT
chr12	MSTRG.38080	MSTRG.38080.1	929670	930364	+	695	1	lincRNA
chr12	MSTRG.38137	MSTRG.38137.1	1276239	1276587	+	349	1	lincRNA
chr12	MSTRG.38223	MSTRG.38223.1	1750405	1751080	+	676	1	lincRNA
chr12	MSTRG.38270	MSTRG.38270.1	1977949	1979772	+	776	2	lincRNA
chr12	MSTRG.38316	MSTRG.38316.1	2351741	2361133	-	797	2	lincRNA
chr12	MSTRG.38453	MSTRG.38453.1	3499501	3502201	+	1040	3	lncNAT
chr12	MSTRG.38462	MSTRG.38462.1	3533674	3536535	+	1029	4	lncNAT
chr12	MSTRG.38464	MSTRG.38464.1	3563800	3564605	+	806	1	lncNAT
chr12	MSTRG.38483	MSTRG.38483.1	3663520	3664991	-	1472	1	lincRNA
chr12	MSTRG.38491	MSTRG.38491.1	3733454	3735177	+	1724	1	lincRNA
chr12	MSTRG.38496	MSTRG.38496.1	3781991	3783043	-	1053	1	lincRNA
chr12	MSTRG.38574	MSTRG.38574.1	4507004	4507798	-	513	3	lncNAT
chr12	MSTRG.38610	MSTRG.38610.1	4908113	4909848	+	830	2	lncNAT
chr12	MSTRG.38700	MSTRG.38700.1	6051324	6052059	-	736	1	lincRNA
chr12	MSTRG.38714	MSTRG.38714.1	6393463	6394308	-	846	1	lincRNA
chr12	MSTRG.38722	MSTRG.38722.1	6566907	6567778	-	872	1	lincRNA
chr12	MSTRG.38740	MSTRG.38740.1	6743433	6744000	+	568	1	lincRNA
chr12	MSTRG.38780	MSTRG.38780.1	7241982	7242986	+	1005	1	lincRNA
chr12	MSTRG.38814	MSTRG.38814.1	7556980	7557987	+	1008	1	lincRNA
chr12	MSTRG.38815	MSTRG.38815.1	7587142	7592092	-	1155	4	lincRNA
chr12	MSTRG.38816	MSTRG.38816.1	7596163	7596478	+	316	1	lincRNA
chr12	MSTRG.38830	MSTRG.38830.1	7786796	7787016	+	221	1	lincRNA
chr12	MSTRG.38842	MSTRG.38842.1	7928988	7929927	-	940	1	lincRNA
chr12	MSTRG.38851	MSTRG.38851.1	8015412	8023161	+	617	2	lincRNA
chr12	MSTRG.38879	MSTRG.38879.1	8799720	8800691	-	972	1	lincRNA
chr12	MSTRG.38900	MSTRG.38900.1	9149226	9149741	-	516	1	lincRNA
chr12	MSTRG.38919	MSTRG.38919.1	9352737	9354182	-	400	3	lncNAT
chr12	MSTRG.38934	MSTRG.38934.1	9610676	9612211	-	1536	1	lincRNA
chr12	MSTRG.38946	MSTRG.38946.1	9864376	9865711	+	1336	1	lincRNA
chr12	MSTRG.38981	MSTRG.38981.1	10421490	10425530	+	533	5	lncNAT
chr12	MSTRG.38990	MSTRG.38990.1	10533541	10534014	-	474	1	lincRNA
chr12	MSTRG.39019	MSTRG.39019.1	10959530	10962212	-	697	3	lncNAT
chr12	MSTRG.39031	MSTRG.39031.1	11087195	11088297	-	1103	1	lincRNA
chr12	MSTRG.39059	MSTRG.39059.1	11579299	11579585	-	287	1	lincRNA
chr12	MSTRG.39061	MSTRG.39061.1	11687991	11689479	+	357	2	lincRNA
chr12	MSTRG.39064	MSTRG.39064.1	11699659	11701196	+	406	2	lincRNA
chr12	MSTRG.39083	MSTRG.39083.1	12240479	12242579	-	385	2	lncNAT
chr12	MSTRG.39086	MSTRG.39086.1	12294192	12296482	+	452	3	lincRNA
chr12	MSTRG.39119	MSTRG.39119.1	12842631	12842850	-	220	1	lincRNA
chr12	MSTRG.39137	MSTRG.39137.1	13103646	13106282	-	1509	10	lncNAT
chr12	MSTRG.39144	MSTRG.39144.1	13342312	13342642	+	331	1	lincRNA
chr12	MSTRG.39154	MSTRG.39154.1	13404629	13404964	+	336	1	lincRNA
chr12	MSTRG.39160	MSTRG.39160.1	13565646	13566362	+	717	1	lincRNA
chr12	MSTRG.39194	MSTRG.39194.1	14156806	14159272	+	563	2	lncNAT
chr12	MSTRG.39214	MSTRG.39214.1	14709115	14709683	-	569	1	lincRNA
chr12	MSTRG.39216	MSTRG.39216.1	14746627	14748952	+	1548	2	lincRNA
chr12	MSTRG.39245	MSTRG.39245.1	15469862	15470780	+	919	1	lincRNA
chr12	MSTRG.39264	MSTRG.39264.1	15919437	15919811	-	375	1	lincRNA
chr12	MSTRG.39270	MSTRG.39270.1	15989561	15991856	+	904	2	lincRNA
chr12	MSTRG.39280	MSTRG.39280.1	16297858	16298108	+	251	1	lincRNA
chr12	MSTRG.39313	MSTRG.39313.1	17354041	17358732	-	552	2	lincRNA
chr12	MSTRG.39344	MSTRG.39344.1	17868935	17869696	+	762	1	lincRNA
chr12	MSTRG.39391	MSTRG.39391.1	18846215	18847599	+	1385	1	lincRNA
chr12	MSTRG.39421	MSTRG.39421.1	19129927	19133741	-	1067	5	lncNAT
chr12	MSTRG.39450	MSTRG.39450.1	19462714	19465569	-	888	6	lncNAT
chr12	MSTRG.39470	MSTRG.39470.1	19675521	19676780	+	1260	1	lncNAT
chr12	MSTRG.39511	MSTRG.39511.1	19928549	19932520	+	675	3	lncNAT
chr12	MSTRG.39504	MSTRG.39504.1	20042293	20043163	-	624	3	lncNAT
chr12	MSTRG.39507	MSTRG.39507.1	20058128	20059621	+	502	3	lncNAT
chr12	MSTRG.39506	MSTRG.39506.1	20060224	20060913	+	690	1	lincRNA
chr12	MSTRG.39655	MSTRG.39655.1	22403531	22404249	-	719	1	lincRNA
chr12	MSTRG.39670	MSTRG.39670.1	22484797	22486206	-	1410	1	lncNAT
chr12	MSTRG.39756	MSTRG.39756.1	23232914	23233125	+	212	1	lincRNA
chr12	MSTRG.39833	MSTRG.39833.1	23735812	23736887	+	978	2	lncNAT
chr12	MSTRG.39865	MSTRG.39865.1	23999784	24000128	+	345	1	lincRNA
chr12	MSTRG.39885	MSTRG.39885.1	24177394	24177717	+	324	1	lncNAT
chr12	MSTRG.39900	MSTRG.39900.1	24330290	24330500	+	211	1	lncNAT
chr12	MSTRG.39907	MSTRG.39907.1	24507173	24509064	+	1892	1	lincRNA
chr12	MSTRG.39931	MSTRG.39931.1	24789779	24790874	+	882	2	lincRNA
chr12	MSTRG.40032	MSTRG.40032.1	25708590	25710075	+	1486	1	lincRNA
chr12	MSTRG.40063	MSTRG.40063.1	25873229	25880734	+	703	2	lncNAT
chr12	MSTRG.40090	MSTRG.40090.1	26060341	26061798	-	712	2	lincRNA
chr12	MSTRG.40104	MSTRG.40104.1	26101112	26103537	+	1428	3	lncNAT
chr12	MSTRG.40120	MSTRG.40120.1	26331250	26332198	+	949	1	lincRNA
chr12	MSTRG.40155	MSTRG.40155.1	26599651	26600126	-	476	1	lncNAT
chr12	MSTRG.40200	MSTRG.40200.1	27038783	27040547	+	1765	1	lincRNA
chr12	MSTRG.40206	MSTRG.40206.1	27060232	27061168	-	824	2	lncNAT
chr12	MSTRG.40209	MSTRG.40209.1	27072888	27073216	+	329	1	lincRNA
chr12	MSTRG.40255	MSTRG.40255.1	27346397	27346920	+	524	1	lncNAT
chr12	MSTRG.40280	MSTRG.40280.1	27469843	27471670	-	968	6	lncNAT
